# Supplementary material for: Methylated cis-regulatory elements mediate KLF4-dependent gene transactivation and cell migration
Source: eLife. 2017 May 29;6:e20068. doi: 10.7554/eLife.20068 (PMC5466421; doi:10.7554/eLife.20068)
Supplement: Figure 3—source data 1. — DOI: http://dx.doi.org/10.7554/eLife.20068.007 [file elife-20068-fig3-data1.xlsx]

## Sheet: mapping rates
RNA-seq	Total Reads	Uniquely mapped	Percentage
WT.r1	33112390	28620145	0.864333
WT.r2	16551774	14513366	0.876847
WT+DOX 48hr.r1	24085248	20748376	0.861456
WT+DOX 48hr.r2	17110455	15003485	0.876861
R458A_control.r1	30053756	25870355	0.860803
R458A_control.r2	18288877	15863828	0.867403
R458A+DOX 48 hr.r1	24642167	21195007	0.860111
R458A+DOX 48 hr.r2	16763748	14482916	0.863943
WT-5'Aza_control.r1	16957548	14802655	0.872924
WT-5'Aza_control.r2	19131791	16874800	0.882029
WT-5'Aza+DOX.r1	19605961	17127764	0.8736
WT-5'Aza+DOX.r2	20172256	17734925	0.879174
