# Supplementary material for: Methylated cis-regulatory elements mediate KLF4-dependent gene transactivation and cell migration
Source: eLife. 2017 May 29;6:e20068. doi: 10.7554/eLife.20068 (PMC5466421; doi:10.7554/eLife.20068)
Supplement: Figure 3—source data 2. — DOI: http://dx.doi.org/10.7554/eLife.20068.008 [file elife-20068-fig3-data2.xlsx]

## Sheet: Sheet1
KLF4 ChIP-seq	Total Reads	Uniquely mapped	Percentage
WT	53859075	41560093	0.7716
R458A	44604882	34238323	0.7676
Input	16126183	11690586	0.725
H3K27ac
WT @ 0 hr	29308310	22030348	0.752
WT @ 48 hr	25681232	19506654	0.76
R458A @ 0 hr	32639771	24126886	0.739
R458A @ 48 hr	28168610	21364461	0.758
H3K27me3
WT @ 0 hr	19969178	14451302	0.724
WT @ 48 hr	14632599	10762264	0.736
R458A @ 0 hr	14046316	9661733	0.688
R458A @ 48 hr	16303157	11134928	0.683
H3K9me3
WT @ 0 hr (ACAGTG)	44259352	23538736	0.532
WT @ 48 hr (GTGAAA)	41757804	21948270	0.526
R458A @ 0 hr (GCCAAT)	50416543	27362585	0.543
R458A @ 48 hr (CTTGTA)	36252536	18720299	0.516
