# Supplementary material for: Methylated cis-regulatory elements mediate KLF4-dependent gene transactivation and cell migration
Source: eLife. 2017 May 29;6:e20068. doi: 10.7554/eLife.20068 (PMC5466421; doi:10.7554/eLife.20068)
Supplement: Figure 3—source data 3. — DOI: http://dx.doi.org/10.7554/eLife.20068.009 [file elife-20068-fig3-data3.xlsx]

## Sheet: Peaks
ID	chr	start	end	Specificity
#0001	chr1	713554	714167	WT-specific
#0002	chr1	873390	873915	WT-specific
#0003	chr1	994810	995264	WT-specific
#0004	chr1	1058919	1060005	WT-specific
#0005	chr1	1695707	1696094	WT-specific
#0006	chr1	1850636	1851288	WT-specific
#0007	chr1	2144114	2144560	WT-specific
#0008	chr1	2343784	2344215	WT-specific
#0009	chr1	6445774	6446292	WT-specific
#0010	chr1	6453554	6454097	WT-specific
#0011	chr1	7529123	7529575	WT-specific
#0012	chr1	8065187	8065631	WT-specific
#0013	chr1	8254506	8255005	WT-specific
#0014	chr1	8257514	8258214	WT-specific
#0015	chr1	9340505	9340952	WT-specific
#0016	chr1	9360154	9360651	WT-specific
#0017	chr1	9375635	9376079	WT-specific
#0018	chr1	9704739	9705145	WT-specific
#0019	chr1	10003163	10003665	WT-specific
#0020	chr1	10269944	10270310	WT-specific
#0021	chr1	10704465	10704933	WT-specific
#0022	chr1	11159877	11160411	WT-specific
#0023	chr1	11850948	11851437	WT-specific
#0024	chr1	12911640	12912138	WT-specific
#0025	chr1	15092102	15092715	WT-specific
#0026	chr1	15279422	15279863	WT-specific
#0027	chr1	16275776	16276228	WT-specific
#0028	chr1	16279191	16279670	WT-specific
#0029	chr1	16359276	16359738	WT-specific
#0030	chr1	16767053	16767675	WT-specific
#0031	chr1	16939739	16940648	WT-specific
#0032	chr1	17516382	17516851	WT-specific
#0033	chr1	17517682	17518085	WT-specific
#0034	chr1	19407987	19408490	WT-specific
#0035	chr1	20914154	20914637	WT-specific
#0036	chr1	20959700	20960109	WT-specific
#0037	chr1	21023259	21023767	WT-specific
#0038	chr1	21476359	21476905	WT-specific
#0039	chr1	21521501	21521974	WT-specific
#0040	chr1	21606356	21606734	WT-specific
#0041	chr1	21650831	21651624	WT-specific
#0042	chr1	21661070	21661619	WT-specific
#0043	chr1	22379090	22379428	WT-specific
#0044	chr1	23337129	23337710	WT-specific
#0045	chr1	23521391	23521943	WT-specific
#0046	chr1	23854694	23855083	WT-specific
#0047	chr1	24127295	24127661	WT-specific
#0048	chr1	24434326	24434794	WT-specific
#0049	chr1	24435498	24436017	WT-specific
#0050	chr1	24476292	24476731	WT-specific
#0051	chr1	25573612	25574305	WT-specific
#0052	chr1	25683303	25683781	WT-specific
#0053	chr1	25876056	25876548	WT-specific
#0054	chr1	26221877	26222267	WT-specific
#0055	chr1	26324745	26325062	WT-specific
#0056	chr1	26604862	26605307	WT-specific
#0057	chr1	26611280	26611703	WT-specific
#0058	chr1	26758644	26759100	WT-specific
#0059	chr1	26827217	26827922	WT-specific
#0060	chr1	26947103	26947805	WT-specific
#0061	chr1	27175787	27176255	WT-specific
#0062	chr1	27339271	27339733	WT-specific
#0063	chr1	27388448	27388867	WT-specific
#0064	chr1	27423811	27424293	WT-specific
#0065	chr1	27518467	27518934	WT-specific
#0066	chr1	27519228	27519689	WT-specific
#0067	chr1	27648297	27648905	WT-specific
#0068	chr1	27816306	27817079	WT-specific
#0069	chr1	28835327	28835911	WT-specific
#0070	chr1	28908085	28908629	WT-specific
#0071	chr1	29449165	29449682	WT-specific
#0072	chr1	29450852	29451344	WT-specific
#0073	chr1	30663951	30664795	WT-specific
#0074	chr1	32054663	32055004	WT-specific
#0075	chr1	32486042	32486315	WT-specific
#0076	chr1	33195434	33195923	WT-specific
#0077	chr1	33457989	33458373	WT-specific
#0078	chr1	33547142	33547735	WT-specific
#0079	chr1	35249139	35249555	WT-specific
#0080	chr1	35497151	35497680	WT-specific
#0081	chr1	36554249	36554683	WT-specific
#0082	chr1	36631224	36631746	WT-specific
#0083	chr1	36839322	36839762	WT-specific
#0084	chr1	36851838	36852492	WT-specific
#0085	chr1	37917290	37917775	WT-specific
#0086	chr1	37920446	37921124	WT-specific
#0087	chr1	40025186	40025654	WT-specific
#0088	chr1	40252065	40252468	WT-specific
#0089	chr1	40505284	40505995	WT-specific
#0090	chr1	40562837	40563374	WT-specific
#0091	chr1	40707524	40708154	WT-specific
#0092	chr1	40723491	40724004	WT-specific
#0093	chr1	41961808	41962293	WT-specific
#0094	chr1	43148641	43149107	WT-specific
#0095	chr1	43201725	43202264	WT-specific
#0096	chr1	43282777	43283217	WT-specific
#0097	chr1	43397772	43398172	WT-specific
#0098	chr1	43838648	43839112	WT-specific
#0099	chr1	43888969	43889851	WT-specific
#0100	chr1	44170465	44170915	WT-specific
#0101	chr1	44495588	44496053	WT-specific
#0102	chr1	45196177	45196866	WT-specific
#0103	chr1	45240733	45241352	WT-specific
#0104	chr1	45476771	45477242	WT-specific
#0105	chr1	45987291	45988108	WT-specific
#0106	chr1	48270744	48271197	WT-specific
#0107	chr1	52625034	52625551	WT-specific
#0108	chr1	54715257	54715790	WT-specific
#0109	chr1	55272942	55273439	WT-specific
#0110	chr1	55894637	55895177	WT-specific
#0111	chr1	56047890	56048256	WT-specific
#0112	chr1	56192678	56193080	WT-specific
#0113	chr1	59049682	59050212	WT-specific
#0114	chr1	59314491	59314932	WT-specific
#0115	chr1	59369385	59369776	WT-specific
#0116	chr1	59737979	59738447	WT-specific
#0117	chr1	62190465	62191091	WT-specific
#0118	chr1	67390415	67390765	WT-specific
#0119	chr1	70671270	70671867	WT-specific
#0120	chr1	70876174	70876991	WT-specific
#0121	chr1	78005424	78005863	WT-specific
#0122	chr1	98576180	98576731	WT-specific
#0123	chr1	99127031	99128075	WT-specific
#0124	chr1	99134038	99134656	WT-specific
#0125	chr1	100023587	100024200	WT-specific
#0126	chr1	100817021	100817620	WT-specific
#0127	chr1	101701944	101702490	WT-specific
#0128	chr1	104068263	104069131	WT-specific
#0129	chr1	109289335	109290243	WT-specific
#0130	chr1	109505659	109506319	WT-specific
#0131	chr1	110090898	110091580	WT-specific
#0132	chr1	110854896	110855585	WT-specific
#0133	chr1	110880539	110881470	WT-specific
#0134	chr1	111173300	111173887	WT-specific
#0135	chr1	112134983	112135908	WT-specific
#0136	chr1	112297933	112298717	WT-specific
#0137	chr1	112933310	112933935	WT-specific
#0138	chr1	113008639	113009143	WT-specific
#0139	chr1	113247288	113247825	WT-specific
#0140	chr1	113249837	113250377	WT-specific
#0141	chr1	113616072	113616565	WT-specific
#0142	chr1	114447220	114447834	WT-specific
#0143	chr1	115258567	115259731	WT-specific
#0144	chr1	115800800	115801531	WT-specific
#0145	chr1	115954200	115954767	WT-specific
#0146	chr1	116914902	116915683	WT-specific
#0147	chr1	117051507	117052267	WT-specific
#0148	chr1	117236259	117237386	WT-specific
#0149	chr1	117410550	117411310	WT-specific
#0150	chr1	118147947	118148692	WT-specific
#0151	chr1	119544524	119545105	WT-specific
#0152	chr1	120593292	120594215	WT-specific
#0153	chr1	120866933	120867520	WT-specific
#0154	chr1	120930392	120930884	WT-specific
#0155	chr1	144070008	144070525	WT-specific
#0156	chr1	144707540	144709331	WT-specific
#0157	chr1	144931273	144933180	WT-specific
#0158	chr1	144982884	144983506	WT-specific
#0159	chr1	145073506	145076960	WT-specific
#0160	chr1	145091307	145092957	WT-specific
#0161	chr1	145382665	145383231	WT-specific
#0162	chr1	146643847	146644367	WT-specific
#0163	chr1	147112549	147112978	WT-specific
#0164	chr1	149374386	149374931	WT-specific
#0165	chr1	149759337	149759856	WT-specific
#0166	chr1	150254100	150254784	WT-specific
#0167	chr1	150534322	150534919	WT-specific
#0168	chr1	151069932	151070331	WT-specific
#0169	chr1	151167478	151168211	WT-specific
#0170	chr1	151547381	151547874	WT-specific
#0171	chr1	151960915	151961488	WT-specific
#0172	chr1	151964810	151966382	WT-specific
#0173	chr1	152007004	152007465	WT-specific
#0174	chr1	152008292	152008848	WT-specific
#0175	chr1	152020523	152021254	WT-specific
#0176	chr1	153517387	153517830	WT-specific
#0177	chr1	153538782	153539477	WT-specific
#0178	chr1	154155418	154155913	WT-specific
#0179	chr1	154298986	154299680	WT-specific
#0180	chr1	154405740	154406230	WT-specific
#0181	chr1	154908947	154909433	WT-specific
#0182	chr1	154947392	154947824	WT-specific
#0183	chr1	154989551	154990257	WT-specific
#0184	chr1	155022817	155023358	WT-specific
#0185	chr1	155162931	155163535	WT-specific
#0186	chr1	155481099	155481841	WT-specific
#0187	chr1	155880978	155881469	WT-specific
#0188	chr1	155931541	155932185	WT-specific
#0189	chr1	156093083	156093883	WT-specific
#0190	chr1	159894071	159895204	WT-specific
#0191	chr1	160175729	160176229	WT-specific
#0192	chr1	161135537	161136107	WT-specific
#0193	chr1	161151985	161152472	WT-specific
#0194	chr1	161509716	161510297	WT-specific
#0195	chr1	200638346	200639017	WT-specific
#0196	chr1	201276731	201277348	WT-specific
#0197	chr1	201430777	201431472	WT-specific
#0198	chr1	201505764	201506100	WT-specific
#0199	chr1	201672838	201673672	WT-specific
#0200	chr1	201680939	201681359	WT-specific
#0201	chr1	201682723	201683246	WT-specific
#0202	chr1	201683248	201684167	WT-specific
#0203	chr1	203146382	203147019	WT-specific
#0204	chr1	203517160	203517688	WT-specific
#0205	chr1	203532458	203532907	WT-specific
#0206	chr1	203596863	203597342	WT-specific
#0207	chr1	203661532	203662431	WT-specific
#0208	chr1	203830481	203830893	WT-specific
#0209	chr1	203937776	203938363	WT-specific
#0210	chr1	205920237	205920598	WT-specific
#0211	chr1	206808529	206808999	WT-specific
#0212	chr1	207494199	207495246	WT-specific
#0213	chr1	208058324	208058769	WT-specific
#0214	chr1	208357615	208358211	WT-specific
#0215	chr1	209171159	209171726	WT-specific
#0216	chr1	210001380	210001831	WT-specific
#0217	chr1	210436003	210436746	WT-specific
#0218	chr1	212732039	212732655	WT-specific
#0219	chr1	214455053	214455563	WT-specific
#0220	chr1	215074953	215075409	WT-specific
#0221	chr1	216774265	216774743	WT-specific
#0222	chr1	217283297	217283633	WT-specific
#0223	chr1	218458230	218458823	WT-specific
#0224	chr1	221898203	221898797	WT-specific
#0225	chr1	222142598	222143054	WT-specific
#0226	chr1	222148323	222148834	WT-specific
#0227	chr1	223263348	223263763	WT-specific
#0228	chr1	224545209	224545622	WT-specific
#0229	chr1	224691074	224691567	WT-specific
#0230	chr1	224803418	224804000	WT-specific
#0231	chr1	224825144	224825667	WT-specific
#0232	chr1	225934967	225935647	WT-specific
#0233	chr1	226187021	226187561	WT-specific
#0234	chr1	227058315	227058760	WT-specific
#0235	chr1	227942016	227942500	WT-specific
#0236	chr1	228032547	228032986	WT-specific
#0237	chr1	228353363	228353897	WT-specific
#0238	chr1	228361544	228362614	WT-specific
#0239	chr1	228646086	228647351	WT-specific
#0240	chr1	228674228	228674818	WT-specific
#0241	chr1	229551474	229551982	WT-specific
#0242	chr1	232058684	232059128	WT-specific
#0243	chr1	232551378	232552001	WT-specific
#0244	chr1	233427880	233428509	WT-specific
#0245	chr1	233656200	233656709	WT-specific
#0246	chr1	234792691	234793200	WT-specific
#0247	chr1	235002044	235002491	WT-specific
#0248	chr1	235493361	235493733	WT-specific
#0249	chr1	243961919	243962604	WT-specific
#0250	chr1	244087499	244088037	WT-specific
#0251	chr1	246859659	246860079	WT-specific
#0252	chr1	246868612	246869103	WT-specific
#0253	chr1	246887228	246887658	WT-specific
#0254	chr1	248033487	248034483	WT-specific
#0255	chr10	990377	990800	WT-specific
#0256	chr10	2564001	2564429	WT-specific
#0257	chr10	2564629	2565757	WT-specific
#0258	chr10	3487873	3488364	WT-specific
#0259	chr10	3509560	3510391	WT-specific
#0260	chr10	3511209	3511723	WT-specific
#0261	chr10	4705278	4705614	WT-specific
#0262	chr10	4982029	4982480	WT-specific
#0263	chr10	5064019	5064489	WT-specific
#0264	chr10	5333725	5334185	WT-specific
#0265	chr10	5423097	5423516	WT-specific
#0266	chr10	5590803	5591245	WT-specific
#0267	chr10	6205680	6206201	WT-specific
#0268	chr10	6244658	6245054	WT-specific
#0269	chr10	6443690	6444086	WT-specific
#0270	chr10	11917684	11918209	WT-specific
#0271	chr10	11928844	11929350	WT-specific
#0272	chr10	13344317	13344747	WT-specific
#0273	chr10	13749216	13749679	WT-specific
#0274	chr10	17269847	17270910	WT-specific
#0275	chr10	17271154	17273035	WT-specific
#0276	chr10	17685358	17685895	WT-specific
#0277	chr10	23721094	23721647	WT-specific
#0278	chr10	24746885	24747273	WT-specific
#0279	chr10	24754255	24754827	WT-specific
#0280	chr10	26009029	26009340	WT-specific
#0281	chr10	29698640	29699075	WT-specific
#0282	chr10	29790689	29791145	WT-specific
#0283	chr10	30441034	30441442	WT-specific
#0284	chr10	30971184	30971682	WT-specific
#0285	chr10	31320283	31320927	WT-specific
#0286	chr10	32734877	32735424	WT-specific
#0287	chr10	33444678	33445197	WT-specific
#0288	chr10	33482899	33483388	WT-specific
#0289	chr10	33654980	33655545	WT-specific
#0290	chr10	33701148	33701642	WT-specific
#0291	chr10	35415889	35416276	WT-specific
#0292	chr10	35588883	35589516	WT-specific
#0293	chr10	35692977	35693512	WT-specific
#0294	chr10	38316883	38317380	WT-specific
#0295	chr10	43932306	43932698	WT-specific
#0296	chr10	45470264	45470799	WT-specific
#0297	chr10	46222438	46222887	WT-specific
#0298	chr10	49658007	49658442	WT-specific
#0299	chr10	51827384	51827894	WT-specific
#0300	chr10	52177631	52178556	WT-specific
#0301	chr10	52346165	52346778	WT-specific
#0302	chr10	54285518	54286020	WT-specific
#0303	chr10	54448692	54449185	WT-specific
#0304	chr10	61438474	61438961	WT-specific
#0305	chr10	63752345	63752940	WT-specific
#0306	chr10	64305391	64305763	WT-specific
#0307	chr10	64861760	64862256	WT-specific
#0308	chr10	64880254	64880722	WT-specific
#0309	chr10	69523815	69524423	WT-specific
#0310	chr10	70166069	70166527	WT-specific
#0311	chr10	71092010	71092566	WT-specific
#0312	chr10	71892378	71892908	WT-specific
#0313	chr10	72409271	72409736	WT-specific
#0314	chr10	73019891	73020464	WT-specific
#0315	chr10	73029720	73030114	WT-specific
#0316	chr10	73526745	73527332	WT-specific
#0317	chr10	73734146	73734806	WT-specific
#0318	chr10	73735131	73735687	WT-specific
#0319	chr10	73857293	73857827	WT-specific
#0320	chr10	73975634	73976050	WT-specific
#0321	chr10	73992338	73992891	WT-specific
#0322	chr10	74385584	74385958	WT-specific
#0323	chr10	74425419	74426201	WT-specific
#0324	chr10	75647361	75647918	WT-specific
#0325	chr10	75648725	75649249	WT-specific
#0326	chr10	75700284	75700786	WT-specific
#0327	chr10	75878551	75878908	WT-specific
#0328	chr10	76969508	76970098	WT-specific
#0329	chr10	78633898	78634293	WT-specific
#0330	chr10	79352666	79353191	WT-specific
#0331	chr10	79503811	79504309	WT-specific
#0332	chr10	79949794	79950162	WT-specific
#0333	chr10	80691476	80692043	WT-specific
#0334	chr10	80732764	80733281	WT-specific
#0335	chr10	80838367	80839077	WT-specific
#0336	chr10	80911335	80911832	WT-specific
#0337	chr10	80952013	80952794	WT-specific
#0338	chr10	81033867	81034391	WT-specific
#0339	chr10	81818388	81818881	WT-specific
#0340	chr10	82265156	82265838	WT-specific
#0341	chr10	86297139	86297899	WT-specific
#0342	chr10	88345137	88345596	WT-specific
#0343	chr10	88730848	88731182	WT-specific
#0344	chr10	89142916	89143342	WT-specific
#0345	chr10	89176549	89177031	WT-specific
#0346	chr10	93358385	93358874	WT-specific
#0347	chr10	93998374	93998932	WT-specific
#0348	chr10	95224477	95225069	WT-specific
#0349	chr10	95230391	95230844	WT-specific
#0350	chr10	95256159	95256623	WT-specific
#0351	chr10	96140681	96141173	WT-specific
#0352	chr10	97849418	97850182	WT-specific
#0353	chr10	99447033	99447590	WT-specific
#0354	chr10	99599751	99600287	WT-specific
#0355	chr10	100074312	100074743	WT-specific
#0356	chr10	100164211	100164639	WT-specific
#0357	chr10	100208067	100208612	WT-specific
#0358	chr10	102130837	102131339	WT-specific
#0359	chr10	102825885	102826386	WT-specific
#0360	chr10	103590158	103590867	WT-specific
#0361	chr10	103887907	103888417	WT-specific
#0362	chr10	103911807	103912139	WT-specific
#0363	chr10	104261483	104261932	WT-specific
#0364	chr10	104405875	104406421	WT-specific
#0365	chr10	105014230	105015089	WT-specific
#0366	chr10	105210940	105211406	WT-specific
#0367	chr10	105238895	105239281	WT-specific
#0368	chr10	110360259	110360633	WT-specific
#0369	chr10	111766296	111767175	WT-specific
#0370	chr10	111836489	111837003	WT-specific
#0371	chr10	112290007	112290389	WT-specific
#0372	chr10	112678203	112678671	WT-specific
#0373	chr10	113899870	113900415	WT-specific
#0374	chr10	116280181	116280663	WT-specific
#0375	chr10	119221281	119221711	WT-specific
#0376	chr10	120850395	120850996	WT-specific
#0377	chr10	121226170	121226518	WT-specific
#0378	chr10	121441611	121442326	WT-specific
#0379	chr10	121632259	121632819	WT-specific
#0380	chr10	122182883	122183263	WT-specific
#0381	chr10	123747033	123747603	WT-specific
#0382	chr10	123822630	123823134	WT-specific
#0383	chr10	123900728	123901102	WT-specific
#0384	chr10	123942393	123943027	WT-specific
#0385	chr10	124466949	124467480	WT-specific
#0386	chr10	126734204	126734737	WT-specific
#0387	chr10	127751768	127752286	WT-specific
#0388	chr10	131908989	131909511	WT-specific
#0389	chr10	135479380	135480276	WT-specific
#0390	chr11	394548	395052	WT-specific
#0391	chr11	727933	728368	WT-specific
#0392	chr11	763302	763600	WT-specific
#0393	chr11	833189	833680	WT-specific
#0394	chr11	833859	834510	WT-specific
#0395	chr11	1147793	1148230	WT-specific
#0396	chr11	1568467	1568926	WT-specific
#0397	chr11	1783622	1784058	WT-specific
#0398	chr11	2949358	2949713	WT-specific
#0399	chr11	3941178	3941721	WT-specific
#0400	chr11	4115631	4116213	WT-specific
#0401	chr11	6640644	6641016	WT-specific
#0402	chr11	10772415	10773001	WT-specific
#0403	chr11	10921326	10921752	WT-specific
#0404	chr11	10938222	10938724	WT-specific
#0405	chr11	12108946	12109729	WT-specific
#0406	chr11	13236638	13237097	WT-specific
#0407	chr11	14912753	14913654	WT-specific
#0408	chr11	15671587	15672044	WT-specific
#0409	chr11	15988587	15989013	WT-specific
#0410	chr11	18405084	18405616	WT-specific
#0411	chr11	18547980	18548482	WT-specific
#0412	chr11	19585616	19585999	WT-specific
#0413	chr11	19701788	19702308	WT-specific
#0414	chr11	19889926	19890368	WT-specific
#0415	chr11	22646836	22647331	WT-specific
#0416	chr11	27230945	27231585	WT-specific
#0417	chr11	28405823	28406421	WT-specific
#0418	chr11	33930600	33931092	WT-specific
#0419	chr11	34937577	34937968	WT-specific
#0420	chr11	35164276	35164741	WT-specific
#0421	chr11	35236328	35236881	WT-specific
#0422	chr11	35604091	35604585	WT-specific
#0423	chr11	35641441	35641912	WT-specific
#0424	chr11	35843115	35843916	WT-specific
#0425	chr11	36355066	36355535	WT-specific
#0426	chr11	36406549	36407024	WT-specific
#0427	chr11	36477228	36477640	WT-specific
#0428	chr11	44622741	44623304	WT-specific
#0429	chr11	45361550	45361972	WT-specific
#0430	chr11	46358197	46358629	WT-specific
#0431	chr11	46638492	46639069	WT-specific
#0432	chr11	46722061	46722551	WT-specific
#0433	chr11	47574648	47575169	WT-specific
#0434	chr11	47789043	47789459	WT-specific
#0435	chr11	47869801	47870229	WT-specific
#0436	chr11	58864525	58865075	WT-specific
#0437	chr11	59015296	59015735	WT-specific
#0438	chr11	59324851	59325297	WT-specific
#0439	chr11	59578141	59578616	WT-specific
#0440	chr11	61348763	61349277	WT-specific
#0441	chr11	61456340	61456731	WT-specific
#0442	chr11	61792850	61793479	WT-specific
#0443	chr11	62310170	62310773	WT-specific
#0444	chr11	62310804	62311146	WT-specific
#0445	chr11	62312175	62312828	WT-specific
#0446	chr11	62313048	62313548	WT-specific
#0447	chr11	62358939	62359321	WT-specific
#0448	chr11	62432585	62433060	WT-specific
#0449	chr11	63952720	63953364	WT-specific
#0450	chr11	64014817	64015295	WT-specific
#0451	chr11	64428032	64428604	WT-specific
#0452	chr11	64614371	64614918	WT-specific
#0453	chr11	64622422	64622891	WT-specific
#0454	chr11	64623684	64624206	WT-specific
#0455	chr11	64691408	64691939	WT-specific
#0456	chr11	64774309	64774905	WT-specific
#0457	chr11	64780922	64781294	WT-specific
#0458	chr11	64794991	64795616	WT-specific
#0459	chr11	64885072	64885595	WT-specific
#0460	chr11	65189551	65190516	WT-specific
#0461	chr11	65192568	65193337	WT-specific
#0462	chr11	65193559	65194630	WT-specific
#0463	chr11	65220268	65221134	WT-specific
#0464	chr11	65274103	65275280	WT-specific
#0465	chr11	65323225	65323650	WT-specific
#0466	chr11	65641015	65641428	WT-specific
#0467	chr11	65769556	65769890	WT-specific
#0468	chr11	66094540	66095826	WT-specific
#0469	chr11	66651321	66651738	WT-specific
#0470	chr11	66845619	66846135	WT-specific
#0471	chr11	67121686	67122293	WT-specific
#0472	chr11	67777514	67777899	WT-specific
#0473	chr11	67784284	67784761	WT-specific
#0474	chr11	67980916	67981587	WT-specific
#0475	chr11	68039553	68040163	WT-specific
#0476	chr11	68227408	68227873	WT-specific
#0477	chr11	68776226	68776621	WT-specific
#0478	chr11	68847808	68848292	WT-specific
#0479	chr11	69048410	69048908	WT-specific
#0480	chr11	69069003	69069905	WT-specific
#0481	chr11	70005610	70006235	WT-specific
#0482	chr11	70089968	70090381	WT-specific
#0483	chr11	70090665	70091186	WT-specific
#0484	chr11	94277186	94277567	WT-specific
#0485	chr11	101881797	101882297	WT-specific
#0486	chr11	118306734	118307147	WT-specific
#0487	chr11	118589623	118590089	WT-specific
#0488	chr11	127909504	127909934	WT-specific
#0489	chr11	130731833	130732182	WT-specific
#0490	chr12	73543	74392	WT-specific
#0491	chr12	656085	656599	WT-specific
#0492	chr12	678983	679275	WT-specific
#0493	chr12	2749431	2749901	WT-specific
#0494	chr12	3258986	3259355	WT-specific
#0495	chr12	3312075	3312559	WT-specific
#0496	chr12	3378787	3379169	WT-specific
#0497	chr12	3382444	3382829	WT-specific
#0498	chr12	3409120	3409590	WT-specific
#0499	chr12	5197948	5198298	WT-specific
#0500	chr12	6387677	6388270	WT-specific
#0501	chr12	6395844	6396334	WT-specific
#0502	chr12	6445228	6445659	WT-specific
#0503	chr12	6644236	6645031	WT-specific
#0504	chr12	6649601	6650083	WT-specific
#0505	chr12	10364507	10365264	WT-specific
#0506	chr12	12509782	12510279	WT-specific
#0507	chr12	12764484	12764895	WT-specific
#0508	chr12	13043986	13044730	WT-specific
#0509	chr12	13349312	13349939	WT-specific
#0510	chr12	13375012	13375555	WT-specific
#0511	chr12	14409421	14409953	WT-specific
#0512	chr12	19249030	19249509	WT-specific
#0513	chr12	21654059	21654872	WT-specific
#0514	chr12	25008376	25008768	WT-specific
#0515	chr12	25538876	25539361	WT-specific
#0516	chr12	26112578	26112945	WT-specific
#0517	chr12	27167245	27167638	WT-specific
#0518	chr12	27512659	27513095	WT-specific
#0519	chr12	28018250	28018847	WT-specific
#0520	chr12	29300953	29301392	WT-specific
#0521	chr12	30200414	30200965	WT-specific
#0522	chr12	30947812	30948279	WT-specific
#0523	chr12	31158670	31159292	WT-specific
#0524	chr12	31812019	31812424	WT-specific
#0525	chr12	32908566	32908900	WT-specific
#0526	chr12	39298673	39299137	WT-specific
#0527	chr12	46384387	46384804	WT-specific
#0528	chr12	46777486	46777954	WT-specific
#0529	chr12	47691312	47691777	WT-specific
#0530	chr12	48146288	48146869	WT-specific
#0531	chr12	49110601	49111173	WT-specific
#0532	chr12	49412420	49412971	WT-specific
#0533	chr12	49524816	49525323	WT-specific
#0534	chr12	49581726	49582403	WT-specific
#0535	chr12	49628162	49628976	WT-specific
#0536	chr12	49658608	49659226	WT-specific
#0537	chr12	49659286	49660132	WT-specific
#0538	chr12	49689777	49690727	WT-specific
#0539	chr12	49961589	49962133	WT-specific
#0540	chr12	50087740	50088275	WT-specific
#0541	chr12	51701893	51702464	WT-specific
#0542	chr12	52430574	52430974	WT-specific
#0543	chr12	52540986	52541558	WT-specific
#0544	chr12	52545574	52546073	WT-specific
#0545	chr12	52591579	52592111	WT-specific
#0546	chr12	52637810	52638274	WT-specific
#0547	chr12	52673971	52674619	WT-specific
#0548	chr12	53264944	53265439	WT-specific
#0549	chr12	53267605	53268681	WT-specific
#0550	chr12	53399570	53400063	WT-specific
#0551	chr12	53610977	53611478	WT-specific
#0552	chr12	54121213	54121764	WT-specific
#0553	chr12	54608526	54608878	WT-specific
#0554	chr12	56109569	56110060	WT-specific
#0555	chr12	56473426	56473975	WT-specific
#0556	chr12	56510072	56510557	WT-specific
#0557	chr12	56519864	56520415	WT-specific
#0558	chr12	57505420	57506259	WT-specific
#0559	chr12	57545828	57546264	WT-specific
#0560	chr12	57559477	57559976	WT-specific
#0561	chr12	57592181	57592605	WT-specific
#0562	chr12	58119786	58120683	WT-specific
#0563	chr12	58977240	58977927	WT-specific
#0564	chr12	58987614	58988120	WT-specific
#0565	chr12	64311592	64312213	WT-specific
#0566	chr12	64580506	64581053	WT-specific
#0567	chr12	65047845	65048271	WT-specific
#0568	chr12	65073161	65073703	WT-specific
#0569	chr12	68758696	68759344	WT-specific
#0570	chr12	69181184	69181576	WT-specific
#0571	chr12	71054618	71055117	WT-specific
#0572	chr12	83044325	83044831	WT-specific
#0573	chr12	88765145	88765807	WT-specific
#0574	chr12	90484955	90485376	WT-specific
#0575	chr12	96429636	96429978	WT-specific
#0576	chr12	102271233	102271622	WT-specific
#0577	chr12	105647540	105648053	WT-specific
#0578	chr12	109125338	109125859	WT-specific
#0579	chr12	109125937	109126296	WT-specific
#0580	chr12	109222440	109223095	WT-specific
#0581	chr12	109914899	109915331	WT-specific
#0582	chr12	110276269	110276662	WT-specific
#0583	chr12	110326135	110326585	WT-specific
#0584	chr12	110348586	110349179	WT-specific
#0585	chr12	110939692	110940244	WT-specific
#0586	chr12	111016011	111016563	WT-specific
#0587	chr12	113478068	113478798	WT-specific
#0588	chr12	114659741	114660273	WT-specific
#0589	chr12	115791770	115792219	WT-specific
#0590	chr12	115800140	115800651	WT-specific
#0591	chr12	116844298	116844785	WT-specific
#0592	chr12	116997067	116997575	WT-specific
#0593	chr12	119474688	119475164	WT-specific
#0594	chr12	120663802	120664187	WT-specific
#0595	chr12	120675067	120675599	WT-specific
#0596	chr12	120691197	120691665	WT-specific
#0597	chr12	120868213	120868594	WT-specific
#0598	chr12	121570922	121571403	WT-specific
#0599	chr12	121790154	121790524	WT-specific
#0600	chr12	121837490	121838035	WT-specific
#0601	chr12	122326434	122327032	WT-specific
#0602	chr12	123011484	123011999	WT-specific
#0603	chr12	123315328	123315918	WT-specific
#0604	chr12	123426867	123427433	WT-specific
#0605	chr12	123943302	123943765	WT-specific
#0606	chr12	124907035	124907753	WT-specific
#0607	chr12	124937888	124938523	WT-specific
#0608	chr12	125062966	125063510	WT-specific
#0609	chr12	125110731	125111246	WT-specific
#0610	chr12	125120756	125121231	WT-specific
#0611	chr12	125165761	125166329	WT-specific
#0612	chr12	125400611	125401269	WT-specific
#0613	chr12	127610358	127610823	WT-specific
#0614	chr12	127663693	127664244	WT-specific
#0615	chr12	128295022	128295543	WT-specific
#0616	chr12	131317290	131317627	WT-specific
#0617	chr12	132303797	132304180	WT-specific
#0618	chr12	132345353	132345935	WT-specific
#0619	chr12	132811614	132812065	WT-specific
#0620	chr12	132817587	132818026	WT-specific
#0621	chr12	132818051	132818937	WT-specific
#0622	chr12	133215036	133215521	WT-specific
#0623	chr12	133286963	133287430	WT-specific
#0624	chr12	133405322	133405859	WT-specific
#0625	chr13	25496953	25497342	WT-specific
#0626	chr13	31248029	31248361	WT-specific
#0627	chr13	41345165	41345862	WT-specific
#0628	chr13	41593198	41593779	WT-specific
#0629	chr13	41635381	41635868	WT-specific
#0630	chr13	43632359	43632820	WT-specific
#0631	chr13	45694201	45694736	WT-specific
#0632	chr13	45754810	45755261	WT-specific
#0633	chr13	45935833	45936343	WT-specific
#0634	chr13	66651164	66651882	WT-specific
#0635	chr13	67507994	67508818	WT-specific
#0636	chr13	73355220	73356601	WT-specific
#0637	chr13	73632667	73633448	WT-specific
#0638	chr13	74703780	74704397	WT-specific
#0639	chr13	74708867	74709562	WT-specific
#0640	chr13	75991105	75991575	WT-specific
#0641	chr13	76111898	76112635	WT-specific
#0642	chr13	76279325	76279998	WT-specific
#0643	chr13	76290866	76291452	WT-specific
#0644	chr13	77460785	77461260	WT-specific
#0645	chr13	77554164	77554715	WT-specific
#0646	chr13	77600337	77600834	WT-specific
#0647	chr13	80155800	80156357	WT-specific
#0648	chr13	80561309	80561883	WT-specific
#0649	chr13	86599204	86599768	WT-specific
#0650	chr13	90806563	90807082	WT-specific
#0651	chr13	91097097	91097743	WT-specific
#0652	chr13	93914965	93915872	WT-specific
#0653	chr13	94255044	94255843	WT-specific
#0654	chr13	96037986	96038775	WT-specific
#0655	chr13	96329053	96329537	WT-specific
#0656	chr13	96705527	96706355	WT-specific
#0657	chr13	98085433	98086086	WT-specific
#0658	chr13	98599404	98599900	WT-specific
#0659	chr13	99137124	99137599	WT-specific
#0660	chr13	99200465	99201120	WT-specific
#0661	chr13	99428417	99428853	WT-specific
#0662	chr13	99739669	99740177	WT-specific
#0663	chr13	99934104	99934568	WT-specific
#0664	chr13	100034624	100034987	WT-specific
#0665	chr13	100150390	100151045	WT-specific
#0666	chr13	101919786	101920666	WT-specific
#0667	chr13	102206771	102207375	WT-specific
#0668	chr13	102844202	102844995	WT-specific
#0669	chr13	106803586	106804162	WT-specific
#0670	chr13	107187711	107188326	WT-specific
#0671	chr13	108118858	108119560	WT-specific
#0672	chr13	110434049	110434629	WT-specific
#0673	chr13	111013536	111014247	WT-specific
#0674	chr13	111049591	111050274	WT-specific
#0675	chr13	111199080	111199591	WT-specific
#0676	chr13	111365457	111365951	WT-specific
#0677	chr13	111367891	111368521	WT-specific
#0678	chr13	111521539	111522240	WT-specific
#0679	chr13	111522368	111522976	WT-specific
#0680	chr13	113260590	113261118	WT-specific
#0681	chr13	113718641	113719197	WT-specific
#0682	chr13	113830505	113831080	WT-specific
#0683	chr13	113841430	113842076	WT-specific
#0684	chr13	113864071	113864626	WT-specific
#0685	chr13	113968086	113969717	WT-specific
#0686	chr13	114145104	114145647	WT-specific
#0687	chr13	114427944	114429163	WT-specific
#0688	chr13	114440013	114440683	WT-specific
#0689	chr13	114444886	114445501	WT-specific
#0690	chr13	114745357	114745795	WT-specific
#0691	chr13	114829463	114830019	WT-specific
#0692	chr13	114843983	114844850	WT-specific
#0693	chr13	115000377	115001130	WT-specific
#0694	chr13	115046019	115046733	WT-specific
#0695	chr13	115060208	115060898	WT-specific
#0696	chr13	115079537	115080055	WT-specific
#0697	chr14	39901267	39901728	WT-specific
#0698	chr14	54075094	54075533	WT-specific
#0699	chr14	54908067	54908422	WT-specific
#0700	chr14	54955167	54956035	WT-specific
#0701	chr14	55569821	55570259	WT-specific
#0702	chr14	55595768	55596123	WT-specific
#0703	chr14	57869521	57870075	WT-specific
#0704	chr14	58666415	58666841	WT-specific
#0705	chr14	61719336	61719918	WT-specific
#0706	chr14	62036509	62036974	WT-specific
#0707	chr14	64854333	64854940	WT-specific
#0708	chr14	65569519	65569935	WT-specific
#0709	chr14	68933253	68933580	WT-specific
#0710	chr14	69044504	69045058	WT-specific
#0711	chr14	69783751	69784292	WT-specific
#0712	chr14	70233398	70234073	WT-specific
#0713	chr14	73603133	73603821	WT-specific
#0714	chr14	74180360	74180972	WT-specific
#0715	chr14	74416412	74416877	WT-specific
#0716	chr14	74977466	74977944	WT-specific
#0717	chr14	75530065	75530594	WT-specific
#0718	chr14	75535562	75536296	WT-specific
#0719	chr14	77419656	77420208	WT-specific
#0720	chr14	77492396	77492964	WT-specific
#0721	chr14	77511859	77512580	WT-specific
#0722	chr14	81686788	81687322	WT-specific
#0723	chr14	81862344	81862866	WT-specific
#0724	chr14	86201319	86201647	WT-specific
#0725	chr14	90849422	90850014	WT-specific
#0726	chr14	90863130	90863796	WT-specific
#0727	chr14	91361235	91361771	WT-specific
#0728	chr14	91585870	91586573	WT-specific
#0729	chr14	92936502	92936917	WT-specific
#0730	chr14	95565275	95565793	WT-specific
#0731	chr14	95946275	95946803	WT-specific
#0732	chr14	95949480	95949966	WT-specific
#0733	chr14	96504073	96504828	WT-specific
#0734	chr14	96552812	96553402	WT-specific
#0735	chr14	99786302	99786790	WT-specific
#0736	chr14	101111948	101112363	WT-specific
#0737	chr14	101292291	101292657	WT-specific
#0738	chr14	102276449	102276826	WT-specific
#0739	chr14	102553251	102553679	WT-specific
#0740	chr14	102997161	102997671	WT-specific
#0741	chr14	103533810	103534337	WT-specific
#0742	chr14	104091113	104091614	WT-specific
#0743	chr14	105146788	105147173	WT-specific
#0744	chr14	105436703	105437123	WT-specific
#0745	chr14	105438784	105439296	WT-specific
#0746	chr14	105948133	105948661	WT-specific
#0747	chr14	105957042	105957452	WT-specific
#0748	chr15	22825671	22826146	WT-specific
#0749	chr15	23086624	23087075	WT-specific
#0750	chr15	28341208	28341694	WT-specific
#0751	chr15	30135732	30136240	WT-specific
#0752	chr15	31246048	31246432	WT-specific
#0753	chr15	31507361	31508286	WT-specific
#0754	chr15	31780969	31781521	WT-specific
#0755	chr15	33360794	33361236	WT-specific
#0756	chr15	34571481	34572063	WT-specific
#0757	chr15	35433964	35434491	WT-specific
#0758	chr15	36706780	36707319	WT-specific
#0759	chr15	38117177	38117670	WT-specific
#0760	chr15	38361599	38362131	WT-specific
#0761	chr15	39160512	39161024	WT-specific
#0762	chr15	40337209	40337738	WT-specific
#0763	chr15	40686962	40687460	WT-specific
#0764	chr15	42376478	42376961	WT-specific
#0765	chr15	42565162	42565632	WT-specific
#0766	chr15	42840762	42841289	WT-specific
#0767	chr15	43843212	43843752	WT-specific
#0768	chr15	44386948	44387480	WT-specific
#0769	chr15	45492451	45492955	WT-specific
#0770	chr15	45571080	45571571	WT-specific
#0771	chr15	45737437	45738023	WT-specific
#0772	chr15	48623334	48623836	WT-specific
#0773	chr15	48666185	48666668	WT-specific
#0774	chr15	48687533	48688129	WT-specific
#0775	chr15	48739859	48740285	WT-specific
#0776	chr15	48858065	48858567	WT-specific
#0777	chr15	49912858	49913388	WT-specific
#0778	chr15	50295622	50296297	WT-specific
#0779	chr15	52121574	52122654	WT-specific
#0780	chr15	52166774	52167335	WT-specific
#0781	chr15	52860995	52861691	WT-specific
#0782	chr15	53029929	53030468	WT-specific
#0783	chr15	57899768	57900245	WT-specific
#0784	chr15	59063038	59063411	WT-specific
#0785	chr15	59165969	59166366	WT-specific
#0786	chr15	59597389	59597909	WT-specific
#0787	chr15	59821070	59821533	WT-specific
#0788	chr15	59847914	59848466	WT-specific
#0789	chr15	60654823	60655411	WT-specific
#0790	chr15	60684649	60685209	WT-specific
#0791	chr15	60688180	60690659	WT-specific
#0792	chr15	62895985	62896438	WT-specific
#0793	chr15	63034889	63035429	WT-specific
#0794	chr15	63050122	63050602	WT-specific
#0795	chr15	63796113	63796643	WT-specific
#0796	chr15	64679756	64680297	WT-specific
#0797	chr15	65117917	65118349	WT-specific
#0798	chr15	65336574	65336996	WT-specific
#0799	chr15	65596787	65597611	WT-specific
#0800	chr15	66161369	66161928	WT-specific
#0801	chr15	66796998	66797757	WT-specific
#0802	chr15	66938574	66939084	WT-specific
#0803	chr15	66978006	66978433	WT-specific
#0804	chr15	67095521	67095999	WT-specific
#0805	chr15	67180082	67180553	WT-specific
#0806	chr15	67390784	67391422	WT-specific
#0807	chr15	67546891	67547315	WT-specific
#0808	chr15	68569933	68570464	WT-specific
#0809	chr15	68870704	68871147	WT-specific
#0810	chr15	69109562	69109985	WT-specific
#0811	chr15	69324732	69325209	WT-specific
#0812	chr15	69351569	69351936	WT-specific
#0813	chr15	70810947	70811402	WT-specific
#0814	chr15	71034018	71034464	WT-specific
#0815	chr15	71055645	71056159	WT-specific
#0816	chr15	71118854	71119378	WT-specific
#0817	chr15	72514700	72515152	WT-specific
#0818	chr15	72520725	72521224	WT-specific
#0819	chr15	72523618	72524200	WT-specific
#0820	chr15	72524527	72524930	WT-specific
#0821	chr15	74248900	74249685	WT-specific
#0822	chr15	74284447	74284763	WT-specific
#0823	chr15	74488574	74489019	WT-specific
#0824	chr15	74610121	74610567	WT-specific
#0825	chr15	75079173	75079605	WT-specific
#0826	chr15	75121697	75122164	WT-specific
#0827	chr15	75198870	75199397	WT-specific
#0828	chr15	75442094	75442865	WT-specific
#0829	chr15	75496962	75497370	WT-specific
#0830	chr15	75660262	75660646	WT-specific
#0831	chr15	75660726	75661259	WT-specific
#0832	chr15	76195602	76196411	WT-specific
#0833	chr15	76469899	76470430	WT-specific
#0834	chr15	78286656	78287146	WT-specific
#0835	chr15	78600242	78600723	WT-specific
#0836	chr15	79090726	79091144	WT-specific
#0837	chr15	80302025	80302979	WT-specific
#0838	chr15	80324615	80325233	WT-specific
#0839	chr15	81069305	81069922	WT-specific
#0840	chr15	81094506	81095041	WT-specific
#0841	chr15	81186055	81186593	WT-specific
#0842	chr15	81269868	81270344	WT-specific
#0843	chr15	82339514	82340125	WT-specific
#0844	chr15	82439630	82440049	WT-specific
#0845	chr15	84048192	84048761	WT-specific
#0846	chr15	85113279	85113823	WT-specific
#0847	chr15	85174240	85174636	WT-specific
#0848	chr15	85523543	85524327	WT-specific
#0849	chr15	85861478	85861936	WT-specific
#0850	chr15	85950779	85951199	WT-specific
#0851	chr15	86131234	86131738	WT-specific
#0852	chr15	89560647	89561188	WT-specific
#0853	chr15	89877889	89878826	WT-specific
#0854	chr15	90365180	90365646	WT-specific
#0855	chr15	90931683	90932259	WT-specific
#0856	chr15	91473129	91473653	WT-specific
#0857	chr15	92485989	92486639	WT-specific
#0858	chr15	93352083	93352819	WT-specific
#0859	chr15	93444132	93444945	WT-specific
#0860	chr15	93461034	93461554	WT-specific
#0861	chr15	99864151	99864673	WT-specific
#0862	chr15	99995154	99995558	WT-specific
#0863	chr15	100026800	100027202	WT-specific
#0864	chr15	101547009	101547593	WT-specific
#0865	chr15	101792175	101792740	WT-specific
#0866	chr15	101817151	101817912	WT-specific
#0867	chr16	585463	585860	WT-specific
#0868	chr16	4428382	4428799	WT-specific
#0869	chr16	9172841	9173300	WT-specific
#0870	chr16	9184885	9185162	WT-specific
#0871	chr16	11171922	11172393	WT-specific
#0872	chr16	11229280	11229745	WT-specific
#0873	chr16	11836503	11837201	WT-specific
#0874	chr16	12009704	12010158	WT-specific
#0875	chr16	12302097	12302664	WT-specific
#0876	chr16	12480418	12480969	WT-specific
#0877	chr16	12897352	12898002	WT-specific
#0878	chr16	14379387	14379983	WT-specific
#0879	chr16	15148990	15149459	WT-specific
#0880	chr16	15187968	15188507	WT-specific
#0881	chr16	15983165	15983554	WT-specific
#0882	chr16	15993472	15993944	WT-specific
#0883	chr16	16298386	16298870	WT-specific
#0884	chr16	17332100	17332653	WT-specific
#0885	chr16	17413218	17413738	WT-specific
#0886	chr16	17685092	17685631	WT-specific
#0887	chr16	18496001	18496485	WT-specific
#0888	chr16	18812559	18813175	WT-specific
#0889	chr16	19016669	19017460	WT-specific
#0890	chr16	19097830	19098315	WT-specific
#0891	chr16	19728840	19729176	WT-specific
#0892	chr16	21311996	21312555	WT-specific
#0893	chr16	21314207	21314793	WT-specific
#0894	chr16	21530911	21532309	WT-specific
#0895	chr16	21600116	21600611	WT-specific
#0896	chr16	22281849	22282293	WT-specific
#0897	chr16	22307576	22308028	WT-specific
#0898	chr16	23160711	23161099	WT-specific
#0899	chr16	23240827	23241398	WT-specific
#0900	chr16	27589922	27590361	WT-specific
#0901	chr16	28814384	28815326	WT-specific
#0902	chr16	29025204	29025633	WT-specific
#0903	chr16	29302202	29302566	WT-specific
#0904	chr16	29465522	29465984	WT-specific
#0905	chr16	29478252	29478868	WT-specific
#0906	chr16	29827490	29827951	WT-specific
#0907	chr16	29955120	29955721	WT-specific
#0908	chr16	30493556	30494349	WT-specific
#0909	chr16	30582903	30583345	WT-specific
#0910	chr16	30786489	30786882	WT-specific
#0911	chr16	30994076	30994615	WT-specific
#0912	chr16	31063293	31063913	WT-specific
#0913	chr16	31076162	31076649	WT-specific
#0914	chr16	34429585	34430092	WT-specific
#0915	chr16	48399744	48400623	WT-specific
#0916	chr16	50279032	50279714	WT-specific
#0917	chr16	51360105	51360999	WT-specific
#0918	chr16	51426510	51426955	WT-specific
#0919	chr16	54065130	54065658	WT-specific
#0920	chr16	54314910	54315373	WT-specific
#0921	chr16	56352248	56352660	WT-specific
#0922	chr16	56377874	56378381	WT-specific
#0923	chr16	56688050	56688648	WT-specific
#0924	chr16	56716173	56716494	WT-specific
#0925	chr16	56998500	56999124	WT-specific
#0926	chr16	57279113	57279439	WT-specific
#0927	chr16	57816082	57816572	WT-specific
#0928	chr16	58426068	58426562	WT-specific
#0929	chr16	58443352	58443697	WT-specific
#0930	chr16	58721159	58721574	WT-specific
#0931	chr16	67555296	67555822	WT-specific
#0932	chr16	67875755	67876397	WT-specific
#0933	chr16	67891450	67891930	WT-specific
#0934	chr16	67993471	67993868	WT-specific
#0935	chr16	68027209	68027837	WT-specific
#0936	chr16	68065751	68066232	WT-specific
#0937	chr16	68271495	68272126	WT-specific
#0938	chr16	69207384	69207875	WT-specific
#0939	chr16	69516498	69516927	WT-specific
#0940	chr16	70505554	70505840	WT-specific
#0941	chr16	71842465	71843018	WT-specific
#0942	chr16	71879541	71880065	WT-specific
#0943	chr16	74482549	74483059	WT-specific
#0944	chr16	74640851	74641292	WT-specific
#0945	chr16	75045804	75046205	WT-specific
#0946	chr16	75150453	75150976	WT-specific
#0947	chr16	75466611	75467105	WT-specific
#0948	chr16	77822110	77822638	WT-specific
#0949	chr16	79018146	79018662	WT-specific
#0950	chr16	81740713	81741287	WT-specific
#0951	chr16	81763603	81764322	WT-specific
#0952	chr16	82661514	82661950	WT-specific
#0953	chr16	84963820	84964763	WT-specific
#0954	chr16	85244756	85245148	WT-specific
#0955	chr16	85404312	85405178	WT-specific
#0956	chr16	86665007	86665588	WT-specific
#0957	chr16	86802587	86802962	WT-specific
#0958	chr16	86958159	86958645	WT-specific
#0959	chr16	86985298	86985869	WT-specific
#0960	chr16	87271626	87272052	WT-specific
#0961	chr16	87615612	87616239	WT-specific
#0962	chr16	88298566	88299013	WT-specific
#0963	chr16	88366623	88367309	WT-specific
#0964	chr16	88848733	88849178	WT-specific
#0965	chr16	88869480	88870113	WT-specific
#0966	chr16	88878427	88878779	WT-specific
#0967	chr16	89074298	89075817	WT-specific
#0968	chr16	89208772	89209386	WT-specific
#0969	chr16	89335463	89335953	WT-specific
#0970	chr16	89394744	89395308	WT-specific
#0971	chr16	89555421	89555828	WT-specific
#0972	chr16	89625449	89626030	WT-specific
#0973	chr16	89699337	89700016	WT-specific
#0974	chr16	89788880	89789495	WT-specific
#0975	chr16	89984104	89984586	WT-specific
#0976	chr16	89989381	89990043	WT-specific
#0977	chr16	90000257	90000813	WT-specific
#0978	chr16	90039052	90039450	WT-specific
#0979	chr16	90061248	90062383	WT-specific
#0980	chr16	90098105	90099283	WT-specific
#0981	chr17	65614	66103	WT-specific
#0982	chr17	964148	964572	WT-specific
#0983	chr17	1014254	1014728	WT-specific
#0984	chr17	1618338	1618912	WT-specific
#0985	chr17	2093325	2093703	WT-specific
#0986	chr17	2296610	2297144	WT-specific
#0987	chr17	2303035	2303700	WT-specific
#0988	chr17	2304359	2305123	WT-specific
#0989	chr17	2310342	2310819	WT-specific
#0990	chr17	2562531	2563077	WT-specific
#0991	chr17	2852845	2853222	WT-specific
#0992	chr17	3478924	3479416	WT-specific
#0993	chr17	4230895	4231394	WT-specific
#0994	chr17	4848432	4848917	WT-specific
#0995	chr17	5487731	5488401	WT-specific
#0996	chr17	6374867	6375220	WT-specific
#0997	chr17	7338448	7338941	WT-specific
#0998	chr17	7387427	7387958	WT-specific
#0999	chr17	7591293	7591796	WT-specific
#1000	chr17	7737841	7738266	WT-specific
#1001	chr17	7819390	7819849	WT-specific
#1002	chr17	8057492	8058037	WT-specific
#1003	chr17	8076386	8077075	WT-specific
#1004	chr17	8123971	8124519	WT-specific
#1005	chr17	8198702	8199424	WT-specific
#1006	chr17	9264520	9264945	WT-specific
#1007	chr17	11973737	11974277	WT-specific
#1008	chr17	12449130	12449599	WT-specific
#1009	chr17	13249902	13250436	WT-specific
#1010	chr17	13251366	13251880	WT-specific
#1011	chr17	13575258	13575713	WT-specific
#1012	chr17	13834926	13835538	WT-specific
#1013	chr17	15165625	15166163	WT-specific
#1014	chr17	15295661	15296067	WT-specific
#1015	chr17	15393914	15394326	WT-specific
#1016	chr17	16284020	16284605	WT-specific
#1017	chr17	16931100	16931818	WT-specific
#1018	chr17	17109421	17110005	WT-specific
#1019	chr17	17323285	17323727	WT-specific
#1020	chr17	17343194	17343773	WT-specific
#1021	chr17	17494788	17495566	WT-specific
#1022	chr17	18161201	18161763	WT-specific
#1023	chr17	18872811	18873267	WT-specific
#1024	chr17	18958765	18959234	WT-specific
#1025	chr17	18966742	18967420	WT-specific
#1026	chr17	18973557	18973910	WT-specific
#1027	chr17	18987058	18987495	WT-specific
#1028	chr17	18995947	18996868	WT-specific
#1029	chr17	19015099	19015887	WT-specific
#1030	chr17	19112996	19113660	WT-specific
#1031	chr17	19122148	19123081	WT-specific
#1032	chr17	19272984	19273615	WT-specific
#1033	chr17	21137336	21137693	WT-specific
#1034	chr17	25572242	25572681	WT-specific
#1035	chr17	25620837	25621392	WT-specific
#1036	chr17	27053358	27053862	WT-specific
#1037	chr17	27070675	27071165	WT-specific
#1038	chr17	27278845	27279523	WT-specific
#1039	chr17	27966325	27966835	WT-specific
#1040	chr17	29898288	29898826	WT-specific
#1041	chr17	29923244	29923862	WT-specific
#1042	chr17	33571299	33572027	WT-specific
#1043	chr17	33914174	33914921	WT-specific
#1044	chr17	35767532	35768041	WT-specific
#1045	chr17	36620808	36621283	WT-specific
#1046	chr17	36833277	36833712	WT-specific
#1047	chr17	37310601	37311139	WT-specific
#1048	chr17	37334664	37335172	WT-specific
#1049	chr17	37910607	37911070	WT-specific
#1050	chr17	38170099	38170444	WT-specific
#1051	chr17	38636690	38637234	WT-specific
#1052	chr17	38677848	38678404	WT-specific
#1053	chr17	39536119	39536625	WT-specific
#1054	chr17	39703753	39704396	WT-specific
#1055	chr17	39844837	39846424	WT-specific
#1056	chr17	39894134	39894554	WT-specific
#1057	chr17	40162235	40162639	WT-specific
#1058	chr17	40713764	40714265	WT-specific
#1059	chr17	40915376	40915840	WT-specific
#1060	chr17	40976379	40976893	WT-specific
#1061	chr17	40997957	40998295	WT-specific
#1062	chr17	41150025	41150622	WT-specific
#1063	chr17	41471394	41471776	WT-specific
#1064	chr17	41494791	41495260	WT-specific
#1065	chr17	41618004	41618662	WT-specific
#1066	chr17	42285643	42286140	WT-specific
#1067	chr17	43306291	43306884	WT-specific
#1068	chr17	43397667	43398070	WT-specific
#1069	chr17	47647360	47647806	WT-specific
#1070	chr17	47785485	47785943	WT-specific
#1071	chr17	48004253	48004707	WT-specific
#1072	chr17	48133939	48134669	WT-specific
#1073	chr17	48138949	48139596	WT-specific
#1074	chr17	48277781	48278399	WT-specific
#1075	chr17	48463709	48464239	WT-specific
#1076	chr17	48473903	48474496	WT-specific
#1077	chr17	48796626	48797380	WT-specific
#1078	chr17	49028092	49028642	WT-specific
#1079	chr17	49198340	49198811	WT-specific
#1080	chr17	49198929	49199424	WT-specific
#1081	chr17	56595135	56595916	WT-specific
#1082	chr17	56612888	56613275	WT-specific
#1083	chr17	57232413	57232892	WT-specific
#1084	chr17	57696907	57697503	WT-specific
#1085	chr17	57863988	57864527	WT-specific
#1086	chr17	58217114	58217673	WT-specific
#1087	chr17	58219327	58219814	WT-specific
#1088	chr17	58469478	58470234	WT-specific
#1089	chr17	60500927	60501375	WT-specific
#1090	chr17	60781801	60782334	WT-specific
#1091	chr17	61117592	61118092	WT-specific
#1092	chr17	61556242	61556581	WT-specific
#1093	chr17	62062400	62062880	WT-specific
#1094	chr17	62502212	62502879	WT-specific
#1095	chr17	62971694	62972352	WT-specific
#1096	chr17	63746723	63747194	WT-specific
#1097	chr17	66243924	66244423	WT-specific
#1098	chr17	66755963	66756498	WT-specific
#1099	chr17	68815048	68815582	WT-specific
#1100	chr17	69180855	69181314	WT-specific
#1101	chr17	69440350	69440785	WT-specific
#1102	chr17	70093621	70094217	WT-specific
#1103	chr17	72754032	72754427	WT-specific
#1104	chr17	72787579	72787950	WT-specific
#1105	chr17	73120193	73120802	WT-specific
#1106	chr17	73452365	73452797	WT-specific
#1107	chr17	73606640	73607133	WT-specific
#1108	chr17	73675998	73676289	WT-specific
#1109	chr17	73687405	73687911	WT-specific
#1110	chr17	73696472	73697068	WT-specific
#1111	chr17	73702966	73703393	WT-specific
#1112	chr17	73865531	73866013	WT-specific
#1113	chr17	73871756	73872372	WT-specific
#1114	chr17	73892202	73892728	WT-specific
#1115	chr17	74049543	74049981	WT-specific
#1116	chr17	74768842	74769358	WT-specific
#1117	chr17	74801358	74801828	WT-specific
#1118	chr17	75134015	75134440	WT-specific
#1119	chr17	75276235	75277010	WT-specific
#1120	chr17	75304863	75305344	WT-specific
#1121	chr17	76311488	76311965	WT-specific
#1122	chr17	76339205	76339933	WT-specific
#1123	chr17	76744681	76745186	WT-specific
#1124	chr17	77848136	77848458	WT-specific
#1125	chr17	77961962	77962476	WT-specific
#1126	chr17	78120932	78121492	WT-specific
#1127	chr17	78388904	78389490	WT-specific
#1128	chr17	78573823	78574148	WT-specific
#1129	chr17	78698522	78698962	WT-specific
#1130	chr17	79478206	79478988	WT-specific
#1131	chr17	79482228	79482575	WT-specific
#1132	chr17	79530943	79531530	WT-specific
#1133	chr17	79549744	79550245	WT-specific
#1134	chr17	79564645	79565146	WT-specific
#1135	chr17	79651115	79651902	WT-specific
#1136	chr17	79701348	79701785	WT-specific
#1137	chr17	79874430	79874888	WT-specific
#1138	chr17	80181918	80182471	WT-specific
#1139	chr17	80188480	80188992	WT-specific
#1140	chr17	80376250	80376716	WT-specific
#1141	chr18	2857346	2857855	WT-specific
#1142	chr18	3247277	3247930	WT-specific
#1143	chr18	3261379	3262339	WT-specific
#1144	chr18	3451352	3451779	WT-specific
#1145	chr18	3623983	3624676	WT-specific
#1146	chr18	5237449	5238295	WT-specific
#1147	chr18	5868180	5868620	WT-specific
#1148	chr18	6729380	6729899	WT-specific
#1149	chr18	7921269	7921739	WT-specific
#1150	chr18	11994251	11994739	WT-specific
#1151	chr18	12308215	12308915	WT-specific
#1152	chr18	12637915	12638460	WT-specific
#1153	chr18	21002776	21003277	WT-specific
#1154	chr18	21032659	21033223	WT-specific
#1155	chr18	28567334	28567840	WT-specific
#1156	chr18	29590186	29590707	WT-specific
#1157	chr18	29665103	29665729	WT-specific
#1158	chr18	32799259	32799703	WT-specific
#1159	chr18	33058434	33058948	WT-specific
#1160	chr18	33077723	33078303	WT-specific
#1161	chr18	33709207	33709594	WT-specific
#1162	chr18	33894037	33894513	WT-specific
#1163	chr18	33901587	33902073	WT-specific
#1164	chr18	39608170	39608671	WT-specific
#1165	chr18	39890897	39891285	WT-specific
#1166	chr18	40851774	40852244	WT-specific
#1167	chr18	43197229	43197614	WT-specific
#1168	chr18	43237850	43238344	WT-specific
#1169	chr18	44268933	44269521	WT-specific
#1170	chr18	45753617	45754057	WT-specific
#1171	chr18	45754626	45755075	WT-specific
#1172	chr18	46423135	46423589	WT-specific
#1173	chr18	46941838	46942312	WT-specific
#1174	chr18	48737935	48738444	WT-specific
#1175	chr18	55568987	55569471	WT-specific
#1176	chr18	55672090	55672581	WT-specific
#1177	chr18	55885290	55885730	WT-specific
#1178	chr18	55989126	55989575	WT-specific
#1179	chr18	57175425	57175883	WT-specific
#1180	chr18	57179210	57179549	WT-specific
#1181	chr18	57585589	57586163	WT-specific
#1182	chr18	61121698	61122235	WT-specific
#1183	chr18	64771988	64772326	WT-specific
#1184	chr18	67064126	67064628	WT-specific
#1185	chr18	68001786	68002347	WT-specific
#1186	chr18	68024891	68025658	WT-specific
#1187	chr18	68051704	68052215	WT-specific
#1188	chr18	71814837	71815351	WT-specific
#1189	chr18	72369429	72370012	WT-specific
#1190	chr18	73088010	73088468	WT-specific
#1191	chr18	73336781	73337280	WT-specific
#1192	chr18	74777011	74777710	WT-specific
#1193	chr18	74779398	74779830	WT-specific
#1194	chr18	77005053	77006665	WT-specific
#1195	chr18	77794467	77794995	WT-specific
#1196	chr19	80102	80606	WT-specific
#1197	chr19	555809	556319	WT-specific
#1198	chr19	752546	753164	WT-specific
#1199	chr19	940903	941353	WT-specific
#1200	chr19	970576	970970	WT-specific
#1201	chr19	1247107	1247778	WT-specific
#1202	chr19	1253586	1254008	WT-specific
#1203	chr19	1258840	1259644	WT-specific
#1204	chr19	1259917	1260588	WT-specific
#1205	chr19	1652663	1653082	WT-specific
#1206	chr19	2095961	2096646	WT-specific
#1207	chr19	2168830	2169344	WT-specific
#1208	chr19	2208256	2208951	WT-specific
#1209	chr19	2236224	2237205	WT-specific
#1210	chr19	2503381	2503860	WT-specific
#1211	chr19	3562261	3562821	WT-specific
#1212	chr19	3626913	3627363	WT-specific
#1213	chr19	3655680	3656289	WT-specific
#1214	chr19	4052690	4053535	WT-specific
#1215	chr19	4057759	4058841	WT-specific
#1216	chr19	4713447	4714086	WT-specific
#1217	chr19	4723765	4724382	WT-specific
#1218	chr19	4914729	4915568	WT-specific
#1219	chr19	4968019	4968571	WT-specific
#1220	chr19	4968848	4969326	WT-specific
#1221	chr19	5173061	5173575	WT-specific
#1222	chr19	5913903	5914425	WT-specific
#1223	chr19	6048904	6049292	WT-specific
#1224	chr19	6677890	6678383	WT-specific
#1225	chr19	7197118	7197656	WT-specific
#1226	chr19	7198271	7198652	WT-specific
#1227	chr19	8373103	8373742	WT-specific
#1228	chr19	8576888	8577246	WT-specific
#1229	chr19	9938341	9938675	WT-specific
#1230	chr19	10676768	10677145	WT-specific
#1231	chr19	11301970	11302349	WT-specific
#1232	chr19	11318949	11319351	WT-specific
#1233	chr19	11376362	11376830	WT-specific
#1234	chr19	12848022	12848472	WT-specific
#1235	chr19	12900827	12901426	WT-specific
#1236	chr19	12943280	12943873	WT-specific
#1237	chr19	13030034	13030310	WT-specific
#1238	chr19	13094607	13095609	WT-specific
#1239	chr19	13137178	13137755	WT-specific
#1240	chr19	13165638	13166047	WT-specific
#1241	chr19	13253960	13254494	WT-specific
#1242	chr19	13263642	13264214	WT-specific
#1243	chr19	13278612	13279000	WT-specific
#1244	chr19	13280464	13280885	WT-specific
#1245	chr19	13721436	13721904	WT-specific
#1246	chr19	13770850	13771343	WT-specific
#1247	chr19	13829396	13829948	WT-specific
#1248	chr19	13947839	13948305	WT-specific
#1249	chr19	13950509	13951037	WT-specific
#1250	chr19	13951057	13952644	WT-specific
#1251	chr19	13961869	13962435	WT-specific
#1252	chr19	14192049	14192611	WT-specific
#1253	chr19	14202194	14202717	WT-specific
#1254	chr19	14527567	14528036	WT-specific
#1255	chr19	14530173	14530631	WT-specific
#1256	chr19	14557357	14557985	WT-specific
#1257	chr19	14685017	14685437	WT-specific
#1258	chr19	15308826	15309397	WT-specific
#1259	chr19	15394399	15394788	WT-specific
#1260	chr19	16308502	16309016	WT-specific
#1261	chr19	16959967	16960474	WT-specific
#1262	chr19	17474408	17474929	WT-specific
#1263	chr19	17622332	17623240	WT-specific
#1264	chr19	17690495	17690872	WT-specific
#1265	chr19	18111584	18112125	WT-specific
#1266	chr19	18169106	18169547	WT-specific
#1267	chr19	18303209	18303786	WT-specific
#1268	chr19	18314867	18315486	WT-specific
#1269	chr19	18370735	18371199	WT-specific
#1270	chr19	18411619	18412186	WT-specific
#1271	chr19	18552644	18553257	WT-specific
#1272	chr19	18682300	18682842	WT-specific
#1273	chr19	19302863	19303217	WT-specific
#1274	chr19	19318102	19319034	WT-specific
#1275	chr19	19515910	19516448	WT-specific
#1276	chr19	30178755	30179176	WT-specific
#1277	chr19	33616792	33617171	WT-specific
#1278	chr19	36231257	36231733	WT-specific
#1279	chr19	36630476	36631172	WT-specific
#1280	chr19	36632075	36632473	WT-specific
#1281	chr19	38663913	38664422	WT-specific
#1282	chr19	38791375	38791848	WT-specific
#1283	chr19	39174760	39175329	WT-specific
#1284	chr19	39832408	39832783	WT-specific
#1285	chr19	39894445	39894923	WT-specific
#1286	chr19	40324401	40324860	WT-specific
#1287	chr19	41075857	41076285	WT-specific
#1288	chr19	41312717	41313191	WT-specific
#1289	chr19	41713292	41713740	WT-specific
#1290	chr19	41815860	41816610	WT-specific
#1291	chr19	42637165	42637656	WT-specific
#1292	chr19	42784408	42785014	WT-specific
#1293	chr19	43829577	43830014	WT-specific
#1294	chr19	44261499	44262152	WT-specific
#1295	chr19	44285194	44286036	WT-specific
#1296	chr19	45457905	45458539	WT-specific
#1297	chr19	46009550	46009994	WT-specific
#1298	chr19	46072086	46072518	WT-specific
#1299	chr19	46117386	46117877	WT-specific
#1300	chr19	46144112	46144556	WT-specific
#1301	chr19	46170783	46171273	WT-specific
#1302	chr19	46224888	46225670	WT-specific
#1303	chr19	46273570	46273971	WT-specific
#1304	chr19	47033243	47033612	WT-specific
#1305	chr19	47103828	47104527	WT-specific
#1306	chr19	47291599	47291960	WT-specific
#1307	chr19	47730151	47730570	WT-specific
#1308	chr19	48281619	48281976	WT-specific
#1309	chr19	50117345	50118064	WT-specific
#1310	chr19	50215561	50215986	WT-specific
#1311	chr19	50433441	50434049	WT-specific
#1312	chr19	50440960	50441570	WT-specific
#1313	chr19	52217858	52218415	WT-specific
#1314	chr19	52223867	52224372	WT-specific
#1315	chr19	52229264	52229898	WT-specific
#1316	chr19	52230600	52231075	WT-specific
#1317	chr19	54975015	54976013	WT-specific
#1318	chr19	55580803	55581139	WT-specific
#1319	chr19	55718399	55718898	WT-specific
#1320	chr19	55727765	55728638	WT-specific
#1321	chr19	55791346	55791676	WT-specific
#1322	chr19	55988092	55988657	WT-specific
#1323	chr19	56111175	56111701	WT-specific
#1324	chr19	56154660	56155171	WT-specific
#1325	chr19	57751765	57752491	WT-specific
#1326	chr19	58694990	58695522	WT-specific
#1327	chr19	58838224	58838751	WT-specific
#1328	chr19	58987219	58987859	WT-specific
#1329	chr19	59031060	59031624	WT-specific
#1330	chr2	740372	740974	WT-specific
#1331	chr2	7952397	7952785	WT-specific
#1332	chr2	8738456	8738940	WT-specific
#1333	chr2	9252463	9252835	WT-specific
#1334	chr2	9282671	9283305	WT-specific
#1335	chr2	9319990	9320521	WT-specific
#1336	chr2	9769353	9769803	WT-specific
#1337	chr2	9796076	9796493	WT-specific
#1338	chr2	9832762	9833501	WT-specific
#1339	chr2	9843318	9843777	WT-specific
#1340	chr2	9892813	9893294	WT-specific
#1341	chr2	10112883	10113374	WT-specific
#1342	chr2	10237479	10237946	WT-specific
#1343	chr2	10275869	10276512	WT-specific
#1344	chr2	10302261	10302720	WT-specific
#1345	chr2	10400320	10400749	WT-specific
#1346	chr2	10418033	10418354	WT-specific
#1347	chr2	10425783	10426241	WT-specific
#1348	chr2	10442429	10442896	WT-specific
#1349	chr2	10637942	10638350	WT-specific
#1350	chr2	10654773	10655396	WT-specific
#1351	chr2	11272927	11273383	WT-specific
#1352	chr2	11919190	11919698	WT-specific
#1353	chr2	12596465	12597073	WT-specific
#1354	chr2	15731736	15732188	WT-specific
#1355	chr2	17826603	17827105	WT-specific
#1356	chr2	19369149	19369598	WT-specific
#1357	chr2	20285588	20286168	WT-specific
#1358	chr2	20379438	20379945	WT-specific
#1359	chr2	20488658	20489178	WT-specific
#1360	chr2	20615360	20615640	WT-specific
#1361	chr2	20629297	20629726	WT-specific
#1362	chr2	20725030	20725450	WT-specific
#1363	chr2	20850617	20851202	WT-specific
#1364	chr2	20860764	20861241	WT-specific
#1365	chr2	24299067	24299466	WT-specific
#1366	chr2	25328057	25328692	WT-specific
#1367	chr2	26256664	26257023	WT-specific
#1368	chr2	26578313	26578866	WT-specific
#1369	chr2	26946713	26947163	WT-specific
#1370	chr2	27308521	27309116	WT-specific
#1371	chr2	27651282	27651717	WT-specific
#1372	chr2	28614313	28615039	WT-specific
#1373	chr2	29117012	29117634	WT-specific
#1374	chr2	30645202	30645650	WT-specific
#1375	chr2	30887708	30888177	WT-specific
#1376	chr2	32390512	32391448	WT-specific
#1377	chr2	33452911	33453379	WT-specific
#1378	chr2	33824395	33824766	WT-specific
#1379	chr2	36600317	36600695	WT-specific
#1380	chr2	38304025	38304476	WT-specific
#1381	chr2	38464852	38465209	WT-specific
#1382	chr2	39351346	39351827	WT-specific
#1383	chr2	40943887	40944473	WT-specific
#1384	chr2	42159768	42160282	WT-specific
#1385	chr2	42352923	42353347	WT-specific
#1386	chr2	43383881	43384283	WT-specific
#1387	chr2	43448891	43449405	WT-specific
#1388	chr2	43451791	43452194	WT-specific
#1389	chr2	45341659	45342119	WT-specific
#1390	chr2	45405024	45405440	WT-specific
#1391	chr2	45465320	45465733	WT-specific
#1392	chr2	45572439	45572793	WT-specific
#1393	chr2	45667409	45667881	WT-specific
#1394	chr2	46864965	46865397	WT-specific
#1395	chr2	47195003	47195521	WT-specific
#1396	chr2	48541257	48541761	WT-specific
#1397	chr2	53580587	53581055	WT-specific
#1398	chr2	54521786	54522140	WT-specific
#1399	chr2	54688289	54688814	WT-specific
#1400	chr2	54751239	54751744	WT-specific
#1401	chr2	55277481	55278428	WT-specific
#1402	chr2	58339868	58340497	WT-specific
#1403	chr2	61244367	61245008	WT-specific
#1404	chr2	61765832	61766268	WT-specific
#1405	chr2	61991179	61992301	WT-specific
#1406	chr2	62515034	62515391	WT-specific
#1407	chr2	62684154	62684588	WT-specific
#1408	chr2	63925840	63926320	WT-specific
#1409	chr2	65058342	65058902	WT-specific
#1410	chr2	65086435	65086891	WT-specific
#1411	chr2	65103420	65103986	WT-specific
#1412	chr2	65527159	65527683	WT-specific
#1413	chr2	65623685	65624227	WT-specific
#1414	chr2	67800180	67800684	WT-specific
#1415	chr2	69533967	69534377	WT-specific
#1416	chr2	69663795	69664494	WT-specific
#1417	chr2	69997256	69997788	WT-specific
#1418	chr2	73441198	73441626	WT-specific
#1419	chr2	74347650	74348036	WT-specific
#1420	chr2	74425725	74426158	WT-specific
#1421	chr2	74681927	74682455	WT-specific
#1422	chr2	74709923	74710408	WT-specific
#1423	chr2	74775794	74776279	WT-specific
#1424	chr2	74967749	74968341	WT-specific
#1425	chr2	75102482	75102996	WT-specific
#1426	chr2	75185404	75185882	WT-specific
#1427	chr2	75833100	75833608	WT-specific
#1428	chr2	85009007	85009482	WT-specific
#1429	chr2	85132659	85133304	WT-specific
#1430	chr2	85134752	85135175	WT-specific
#1431	chr2	85172913	85173230	WT-specific
#1432	chr2	85280953	85281351	WT-specific
#1433	chr2	85640898	85641505	WT-specific
#1434	chr2	85660727	85661162	WT-specific
#1435	chr2	85725767	85726636	WT-specific
#1436	chr2	85766085	85766644	WT-specific
#1437	chr2	86070588	86071108	WT-specific
#1438	chr2	86667919	86668373	WT-specific
#1439	chr2	86790075	86790734	WT-specific
#1440	chr2	87552359	87552792	WT-specific
#1441	chr2	88488289	88488653	WT-specific
#1442	chr2	91952780	91953378	WT-specific
#1443	chr2	92010665	92011294	WT-specific
#1444	chr2	92217569	92218013	WT-specific
#1445	chr2	96657395	96657886	WT-specific
#1446	chr2	97199354	97199766	WT-specific
#1447	chr2	97779021	97779381	WT-specific
#1448	chr2	98612336	98612770	WT-specific
#1449	chr2	100106424	100106962	WT-specific
#1450	chr2	100308296	100308794	WT-specific
#1451	chr2	102313596	102314042	WT-specific
#1452	chr2	102844101	102844699	WT-specific
#1453	chr2	109065144	109065715	WT-specific
#1454	chr2	109588418	109588975	WT-specific
#1455	chr2	110441594	110442078	WT-specific
#1456	chr2	110969888	110970426	WT-specific
#1457	chr2	112290418	112290975	WT-specific
#1458	chr2	112813506	112814146	WT-specific
#1459	chr2	113239297	113239716	WT-specific
#1460	chr2	113357414	113358014	WT-specific
#1461	chr2	113381888	113382810	WT-specific
#1462	chr2	113402827	113403392	WT-specific
#1463	chr2	113627097	113627592	WT-specific
#1464	chr2	114332079	114332618	WT-specific
#1465	chr2	114635462	114635965	WT-specific
#1466	chr2	120980500	120980796	WT-specific
#1467	chr2	121467082	121467516	WT-specific
#1468	chr2	127975446	127975919	WT-specific
#1469	chr2	128419461	128419904	WT-specific
#1470	chr2	130938956	130939370	WT-specific
#1471	chr2	131099623	131100599	WT-specific
#1472	chr2	131129938	131130493	WT-specific
#1473	chr2	132250365	132250814	WT-specific
#1474	chr2	135532723	135533264	WT-specific
#1475	chr2	139031913	139032259	WT-specific
#1476	chr2	143249354	143249799	WT-specific
#1477	chr2	143625735	143626206	WT-specific
#1478	chr2	144487713	144488161	WT-specific
#1479	chr2	145417371	145417707	WT-specific
#1480	chr2	146440055	146440428	WT-specific
#1481	chr2	147907076	147908074	WT-specific
#1482	chr2	150278811	150279317	WT-specific
#1483	chr2	152096068	152096579	WT-specific
#1484	chr2	152266066	152266634	WT-specific
#1485	chr2	153057015	153057507	WT-specific
#1486	chr2	153574978	153575942	WT-specific
#1487	chr2	158714344	158714756	WT-specific
#1488	chr2	160183052	160183693	WT-specific
#1489	chr2	160568527	160569444	WT-specific
#1490	chr2	161264076	161264499	WT-specific
#1491	chr2	162270898	162271438	WT-specific
#1492	chr2	166150327	166150705	WT-specific
#1493	chr2	167232459	167232977	WT-specific
#1494	chr2	170440538	170441004	WT-specific
#1495	chr2	170676528	170676960	WT-specific
#1496	chr2	172543965	172544899	WT-specific
#1497	chr2	173410261	173410876	WT-specific
#1498	chr2	173860546	173861006	WT-specific
#1499	chr2	174916435	174916852	WT-specific
#1500	chr2	177502376	177503130	WT-specific
#1501	chr2	179279414	179279782	WT-specific
#1502	chr2	181388643	181389231	WT-specific
#1503	chr2	182741353	182741823	WT-specific
#1504	chr2	188901535	188901999	WT-specific
#1505	chr2	191443125	191443890	WT-specific
#1506	chr2	192542714	192543430	WT-specific
#1507	chr2	198325465	198326361	WT-specific
#1508	chr2	198364503	198364912	WT-specific
#1509	chr2	201728634	201729194	WT-specific
#1510	chr2	201936358	201936929	WT-specific
#1511	chr2	202041928	202042323	WT-specific
#1512	chr2	204103602	204104051	WT-specific
#1513	chr2	204268277	204268845	WT-specific
#1514	chr2	204400145	204400536	WT-specific
#1515	chr2	208259628	208260224	WT-specific
#1516	chr2	209118663	209119093	WT-specific
#1517	chr2	210867007	210867297	WT-specific
#1518	chr2	216838635	216839113	WT-specific
#1519	chr2	217276881	217277542	WT-specific
#1520	chr2	217363188	217363663	WT-specific
#1521	chr2	217501886	217502408	WT-specific
#1522	chr2	217964172	217964613	WT-specific
#1523	chr2	219095497	219095980	WT-specific
#1524	chr2	219137366	219138003	WT-specific
#1525	chr2	219151372	219151896	WT-specific
#1526	chr2	219157153	219157601	WT-specific
#1527	chr2	220024785	220025270	WT-specific
#1528	chr2	220042619	220043121	WT-specific
#1529	chr2	220144238	220144666	WT-specific
#1530	chr2	221144005	221144563	WT-specific
#1531	chr2	224951228	224951773	WT-specific
#1532	chr2	224967045	224967428	WT-specific
#1533	chr2	225618825	225619365	WT-specific
#1534	chr2	228682812	228683295	WT-specific
#1535	chr2	230281061	230281610	WT-specific
#1536	chr2	231280684	231281172	WT-specific
#1537	chr2	231577301	231577761	WT-specific
#1538	chr2	231599368	231599834	WT-specific
#1539	chr2	232507240	232507769	WT-specific
#1540	chr2	232893338	232893721	WT-specific
#1541	chr2	233432775	233433325	WT-specific
#1542	chr2	233721196	233721815	WT-specific
#1543	chr2	233791636	233792253	WT-specific
#1544	chr2	233853099	233853556	WT-specific
#1545	chr2	233864157	233864584	WT-specific
#1546	chr2	234074541	234075002	WT-specific
#1547	chr2	234475140	234475535	WT-specific
#1548	chr2	235321326	235321801	WT-specific
#1549	chr2	235634261	235634921	WT-specific
#1550	chr2	237551139	237551883	WT-specific
#1551	chr2	237619926	237620472	WT-specific
#1552	chr2	238093079	238093632	WT-specific
#1553	chr2	238406454	238406867	WT-specific
#1554	chr2	238467761	238468166	WT-specific
#1555	chr2	238596299	238596879	WT-specific
#1556	chr2	239860261	239860647	WT-specific
#1557	chr2	240322901	240323736	WT-specific
#1558	chr2	241190775	241191243	WT-specific
#1559	chr2	241309540	241309898	WT-specific
#1560	chr2	241453215	241453723	WT-specific
#1561	chr2	242786220	242786713	WT-specific
#1562	chr2	242801537	242802002	WT-specific
#1563	chr2	242823506	242823864	WT-specific
#1564	chr20	19839626	19840079	WT-specific
#1565	chr20	30133038	30133853	WT-specific
#1566	chr20	30160535	30161002	WT-specific
#1567	chr20	30180934	30182158	WT-specific
#1568	chr20	30198288	30198873	WT-specific
#1569	chr20	30235953	30236383	WT-specific
#1570	chr20	30315101	30316089	WT-specific
#1571	chr20	30423671	30424315	WT-specific
#1572	chr20	31063063	31063544	WT-specific
#1573	chr20	31147354	31148235	WT-specific
#1574	chr20	31149118	31149646	WT-specific
#1575	chr20	32010874	32011457	WT-specific
#1576	chr20	32297664	32298062	WT-specific
#1577	chr20	32978470	32979019	WT-specific
#1578	chr20	33104108	33104783	WT-specific
#1579	chr20	33303113	33303729	WT-specific
#1580	chr20	33917327	33917817	WT-specific
#1581	chr20	34204623	34205153	WT-specific
#1582	chr20	34329397	34330282	WT-specific
#1583	chr20	34471548	34472369	WT-specific
#1584	chr20	34582385	34583419	WT-specific
#1585	chr20	34637968	34639285	WT-specific
#1586	chr20	34681004	34681807	WT-specific
#1587	chr20	35092064	35092880	WT-specific
#1588	chr20	35093770	35094381	WT-specific
#1589	chr20	35095512	35096360	WT-specific
#1590	chr20	35436863	35437772	WT-specific
#1591	chr20	35515540	35516039	WT-specific
#1592	chr20	35807274	35807809	WT-specific
#1593	chr20	36012959	36013570	WT-specific
#1594	chr20	36781057	36782090	WT-specific
#1595	chr20	36801642	36802253	WT-specific
#1596	chr20	36984943	36985505	WT-specific
#1597	chr20	37063831	37064674	WT-specific
#1598	chr20	37075008	37075416	WT-specific
#1599	chr20	37418056	37418560	WT-specific
#1600	chr20	39126864	39127747	WT-specific
#1601	chr20	39317758	39318550	WT-specific
#1602	chr20	39632244	39632998	WT-specific
#1603	chr20	39969225	39969682	WT-specific
#1604	chr20	42219041	42219618	WT-specific
#1605	chr20	42356509	42356929	WT-specific
#1606	chr20	42839457	42840012	WT-specific
#1607	chr20	43321497	43322138	WT-specific
#1608	chr20	43343118	43343706	WT-specific
#1609	chr20	43514220	43514921	WT-specific
#1610	chr20	43911892	43912813	WT-specific
#1611	chr20	44065435	44065975	WT-specific
#1612	chr20	44214516	44215131	WT-specific
#1613	chr20	44407480	44408041	WT-specific
#1614	chr20	44464463	44465430	WT-specific
#1615	chr20	44509891	44510452	WT-specific
#1616	chr20	44519603	44520072	WT-specific
#1617	chr20	44563050	44563739	WT-specific
#1618	chr20	44600799	44601415	WT-specific
#1619	chr20	44717842	44718737	WT-specific
#1620	chr20	45376629	45377072	WT-specific
#1621	chr20	46004731	46005398	WT-specific
#1622	chr20	46018464	46019099	WT-specific
#1623	chr20	46130187	46130870	WT-specific
#1624	chr20	47457603	47458319	WT-specific
#1625	chr20	47894497	47895048	WT-specific
#1626	chr20	47895292	47896317	WT-specific
#1627	chr20	47961936	47962614	WT-specific
#1628	chr20	48293035	48293900	WT-specific
#1629	chr20	48428900	48429407	WT-specific
#1630	chr20	48585994	48586524	WT-specific
#1631	chr20	48595451	48596041	WT-specific
#1632	chr20	48663335	48663970	WT-specific
#1633	chr20	48720309	48720848	WT-specific
#1634	chr20	48782291	48783082	WT-specific
#1635	chr20	48863737	48864436	WT-specific
#1636	chr20	48864578	48865244	WT-specific
#1637	chr20	49032078	49032583	WT-specific
#1638	chr20	49271946	49272533	WT-specific
#1639	chr20	49676396	49676847	WT-specific
#1640	chr20	49961997	49962820	WT-specific
#1641	chr20	49982888	49983443	WT-specific
#1642	chr20	50149614	50150260	WT-specific
#1643	chr20	50303464	50303984	WT-specific
#1644	chr20	50808142	50809170	WT-specific
#1645	chr20	52195817	52196423	WT-specific
#1646	chr20	55043199	55043802	WT-specific
#1647	chr20	55286197	55286622	WT-specific
#1648	chr20	55362976	55363758	WT-specific
#1649	chr20	58795243	58796342	WT-specific
#1650	chr20	58824533	58825145	WT-specific
#1651	chr20	59702631	59703249	WT-specific
#1652	chr20	60500450	60500934	WT-specific
#1653	chr20	60812797	60813413	WT-specific
#1654	chr20	60876841	60877285	WT-specific
#1655	chr20	60932081	60933076	WT-specific
#1656	chr20	60934111	60934945	WT-specific
#1657	chr20	60936128	60936739	WT-specific
#1658	chr20	61187507	61187998	WT-specific
#1659	chr20	61195528	61196423	WT-specific
#1660	chr20	61387656	61388343	WT-specific
#1661	chr20	61427412	61427847	WT-specific
#1662	chr20	61557605	61558073	WT-specific
#1663	chr20	61817862	61818310	WT-specific
#1664	chr20	61863859	61864433	WT-specific
#1665	chr20	62372303	62372704	WT-specific
#1666	chr20	62496993	62497572	WT-specific
#1667	chr20	62572879	62573913	WT-specific
#1668	chr20	62587035	62587550	WT-specific
#1669	chr20	62588504	62589040	WT-specific
#1670	chr21	15906180	15906655	WT-specific
#1671	chr21	17909234	17909762	WT-specific
#1672	chr21	28937637	28938205	WT-specific
#1673	chr21	30535057	30535449	WT-specific
#1674	chr21	32654579	32655130	WT-specific
#1675	chr21	34752755	34753137	WT-specific
#1676	chr21	34814246	34814828	WT-specific
#1677	chr21	35013880	35014610	WT-specific
#1678	chr21	35883481	35883972	WT-specific
#1679	chr21	35971381	35971942	WT-specific
#1680	chr21	36116114	36116557	WT-specific
#1681	chr21	36261910	36262336	WT-specific
#1682	chr21	37432521	37433111	WT-specific
#1683	chr21	37709238	37709793	WT-specific
#1684	chr21	39245917	39246401	WT-specific
#1685	chr21	43050202	43050725	WT-specific
#1686	chr21	43973575	43973884	WT-specific
#1687	chr21	44086171	44086587	WT-specific
#1688	chr21	44343879	44344401	WT-specific
#1689	chr21	45066383	45066947	WT-specific
#1690	chr21	45153931	45154416	WT-specific
#1691	chr21	45187756	45188437	WT-specific
#1692	chr21	45204468	45204933	WT-specific
#1693	chr21	45836678	45837868	WT-specific
#1694	chr21	46291822	46292266	WT-specific
#1695	chr21	46920338	46921086	WT-specific
#1696	chr21	47519370	47520081	WT-specific
#1697	chr21	47536707	47537220	WT-specific
#1698	chr21	47604307	47604715	WT-specific
#1699	chr21	48055421	48056075	WT-specific
#1700	chr21	48081170	48081508	WT-specific
#1701	chr22	18111422	18111907	WT-specific
#1702	chr22	18236048	18236551	WT-specific
#1703	chr22	18264375	18264764	WT-specific
#1704	chr22	18484159	18484969	WT-specific
#1705	chr22	18521061	18521533	WT-specific
#1706	chr22	18538879	18539310	WT-specific
#1707	chr22	18769483	18769954	WT-specific
#1708	chr22	18860338	18860886	WT-specific
#1709	chr22	19385619	19386115	WT-specific
#1710	chr22	19419667	19420180	WT-specific
#1711	chr22	19868546	19869183	WT-specific
#1712	chr22	20104692	20105110	WT-specific
#1713	chr22	20193618	20194100	WT-specific
#1714	chr22	20708672	20716706	WT-specific
#1715	chr22	20922172	20922681	WT-specific
#1716	chr22	20923240	20923939	WT-specific
#1717	chr22	21537695	21538633	WT-specific
#1718	chr22	21663329	21663692	WT-specific
#1719	chr22	21909820	21910535	WT-specific
#1720	chr22	22337149	22337481	WT-specific
#1721	chr22	22711521	22711875	WT-specific
#1722	chr22	23568066	23568557	WT-specific
#1723	chr22	23624729	23625225	WT-specific
#1724	chr22	24129317	24129796	WT-specific
#1725	chr22	24447971	24448272	WT-specific
#1726	chr22	24552818	24553312	WT-specific
#1727	chr22	25387774	25388347	WT-specific
#1728	chr22	25389878	25390362	WT-specific
#1729	chr22	25422213	25422756	WT-specific
#1730	chr22	26155854	26156406	WT-specific
#1731	chr22	26946434	26946994	WT-specific
#1732	chr22	27068277	27068969	WT-specific
#1733	chr22	27530300	27530773	WT-specific
#1734	chr22	28114152	28114606	WT-specific
#1735	chr22	28122718	28123168	WT-specific
#1736	chr22	28148674	28149177	WT-specific
#1737	chr22	29436566	29436991	WT-specific
#1738	chr22	29706780	29707403	WT-specific
#1739	chr22	31030917	31031512	WT-specific
#1740	chr22	31063495	31064265	WT-specific
#1741	chr22	31198767	31199265	WT-specific
#1742	chr22	31555833	31556312	WT-specific
#1743	chr22	32056805	32057261	WT-specific
#1744	chr22	32533953	32534498	WT-specific
#1745	chr22	32954650	32955126	WT-specific
#1746	chr22	35746788	35747347	WT-specific
#1747	chr22	35796279	35796736	WT-specific
#1748	chr22	35864737	35865193	WT-specific
#1749	chr22	36023571	36024125	WT-specific
#1750	chr22	36290930	36291475	WT-specific
#1751	chr22	36682360	36682970	WT-specific
#1752	chr22	36726452	36727079	WT-specific
#1753	chr22	36956954	36957415	WT-specific
#1754	chr22	36958446	36958872	WT-specific
#1755	chr22	37663157	37663522	WT-specific
#1756	chr22	37921360	37921939	WT-specific
#1757	chr22	38077469	38077928	WT-specific
#1758	chr22	38283584	38283954	WT-specific
#1759	chr22	38329791	38330273	WT-specific
#1760	chr22	38598762	38599103	WT-specific
#1761	chr22	38614616	38614961	WT-specific
#1762	chr22	39096855	39097524	WT-specific
#1763	chr22	39705892	39706266	WT-specific
#1764	chr22	39916118	39916818	WT-specific
#1765	chr22	39919298	39919998	WT-specific
#1766	chr22	41842598	41843122	WT-specific
#1767	chr22	41864726	41865271	WT-specific
#1768	chr22	43010831	43011585	WT-specific
#1769	chr22	43031573	43031918	WT-specific
#1770	chr22	43058053	43058874	WT-specific
#1771	chr22	43139673	43140242	WT-specific
#1772	chr22	43315420	43315805	WT-specific
#1773	chr22	43463524	43464006	WT-specific
#1774	chr22	43548294	43548777	WT-specific
#1775	chr22	43583514	43583992	WT-specific
#1776	chr22	44954470	44955005	WT-specific
#1777	chr22	45371455	45371836	WT-specific
#1778	chr22	45468077	45468598	WT-specific
#1779	chr22	45558784	45559390	WT-specific
#1780	chr22	45968316	45968723	WT-specific
#1781	chr22	46034788	46035425	WT-specific
#1782	chr22	46409772	46410349	WT-specific
#1783	chr22	46481469	46482115	WT-specific
#1784	chr22	46501337	46501965	WT-specific
#1785	chr22	46897553	46898055	WT-specific
#1786	chr22	47135021	47135482	WT-specific
#1787	chr22	47689730	47690234	WT-specific
#1788	chr22	50710045	50710461	WT-specific
#1789	chr3	4866524	4867026	WT-specific
#1790	chr3	4869982	4870655	WT-specific
#1791	chr3	4910257	4910642	WT-specific
#1792	chr3	5019223	5020085	WT-specific
#1793	chr3	5020151	5020553	WT-specific
#1794	chr3	5028276	5028977	WT-specific
#1795	chr3	5059394	5060006	WT-specific
#1796	chr3	5099554	5099899	WT-specific
#1797	chr3	8671025	8671661	WT-specific
#1798	chr3	9343999	9344537	WT-specific
#1799	chr3	9437543	9438229	WT-specific
#1800	chr3	9773036	9773601	WT-specific
#1801	chr3	9926036	9926552	WT-specific
#1802	chr3	10362677	10363127	WT-specific
#1803	chr3	11201152	11201768	WT-specific
#1804	chr3	11888010	11888555	WT-specific
#1805	chr3	12620204	12620722	WT-specific
#1806	chr3	12996528	12996919	WT-specific
#1807	chr3	13579318	13579799	WT-specific
#1808	chr3	13689127	13689617	WT-specific
#1809	chr3	15140390	15140892	WT-specific
#1810	chr3	16306016	16306721	WT-specific
#1811	chr3	16391686	16392117	WT-specific
#1812	chr3	20381766	20382236	WT-specific
#1813	chr3	21876778	21877155	WT-specific
#1814	chr3	22776310	22776610	WT-specific
#1815	chr3	30552870	30553380	WT-specific
#1816	chr3	32010459	32011011	WT-specific
#1817	chr3	32022788	32023301	WT-specific
#1818	chr3	32463598	32464124	WT-specific
#1819	chr3	33840279	33840741	WT-specific
#1820	chr3	37034643	37035203	WT-specific
#1821	chr3	38072678	38073153	WT-specific
#1822	chr3	38206061	38206651	WT-specific
#1823	chr3	39188489	39188959	WT-specific
#1824	chr3	40498598	40499079	WT-specific
#1825	chr3	40566217	40566702	WT-specific
#1826	chr3	40690768	40691204	WT-specific
#1827	chr3	41158825	41159241	WT-specific
#1828	chr3	41703537	41704257	WT-specific
#1829	chr3	42622982	42623451	WT-specific
#1830	chr3	42801795	42802412	WT-specific
#1831	chr3	44264799	44265384	WT-specific
#1832	chr3	44666198	44666698	WT-specific
#1833	chr3	45175457	45175969	WT-specific
#1834	chr3	45208948	45209462	WT-specific
#1835	chr3	45592877	45593343	WT-specific
#1836	chr3	46269633	46270192	WT-specific
#1837	chr3	46975855	46976527	WT-specific
#1838	chr3	47830253	47830796	WT-specific
#1839	chr3	48487798	48488376	WT-specific
#1840	chr3	48700948	48701565	WT-specific
#1841	chr3	49055415	49055791	WT-specific
#1842	chr3	49058760	49059318	WT-specific
#1843	chr3	49377362	49377806	WT-specific
#1844	chr3	49466910	49467449	WT-specific
#1845	chr3	49711108	49711651	WT-specific
#1846	chr3	50285755	50286253	WT-specific
#1847	chr3	50288529	50289068	WT-specific
#1848	chr3	50297356	50297714	WT-specific
#1849	chr3	50336046	50336740	WT-specific
#1850	chr3	50556952	50557345	WT-specific
#1851	chr3	50606593	50607319	WT-specific
#1852	chr3	50664738	50665264	WT-specific
#1853	chr3	51381704	51382109	WT-specific
#1854	chr3	52188502	52189046	WT-specific
#1855	chr3	52532248	52532597	WT-specific
#1856	chr3	52931619	52932157	WT-specific
#1857	chr3	53272145	53272502	WT-specific
#1858	chr3	53381519	53381976	WT-specific
#1859	chr3	55450405	55450901	WT-specific
#1860	chr3	58079537	58079922	WT-specific
#1861	chr3	58202747	58203190	WT-specific
#1862	chr3	59035439	59035882	WT-specific
#1863	chr3	60710243	60710615	WT-specific
#1864	chr3	61560420	61560822	WT-specific
#1865	chr3	61693511	61694004	WT-specific
#1866	chr3	62304889	62305375	WT-specific
#1867	chr3	72083996	72084653	WT-specific
#1868	chr3	72323612	72324181	WT-specific
#1869	chr3	72386208	72386651	WT-specific
#1870	chr3	72388345	72388786	WT-specific
#1871	chr3	72541542	72541973	WT-specific
#1872	chr3	78653252	78653742	WT-specific
#1873	chr3	81810180	81810948	WT-specific
#1874	chr3	87786831	87787426	WT-specific
#1875	chr3	100631726	100632228	WT-specific
#1876	chr3	101707522	101708071	WT-specific
#1877	chr3	105085102	105085571	WT-specific
#1878	chr3	105588122	105588586	WT-specific
#1879	chr3	106279113	106279954	WT-specific
#1880	chr3	110790151	110790608	WT-specific
#1881	chr3	110945978	110946422	WT-specific
#1882	chr3	111623451	111624032	WT-specific
#1883	chr3	114936509	114937162	WT-specific
#1884	chr3	115377118	115377770	WT-specific
#1885	chr3	119814159	119814696	WT-specific
#1886	chr3	122786940	122787281	WT-specific
#1887	chr3	123996255	123996840	WT-specific
#1888	chr3	124512030	124512564	WT-specific
#1889	chr3	124531579	124532040	WT-specific
#1890	chr3	124847826	124848234	WT-specific
#1891	chr3	126108045	126108581	WT-specific
#1892	chr3	126636034	126636496	WT-specific
#1893	chr3	126680053	126680414	WT-specific
#1894	chr3	126754556	126754895	WT-specific
#1895	chr3	127536329	127536861	WT-specific
#1896	chr3	127842574	127843202	WT-specific
#1897	chr3	128135522	128136037	WT-specific
#1898	chr3	128949188	128950187	WT-specific
#1899	chr3	128957635	128958182	WT-specific
#1900	chr3	131100354	131100819	WT-specific
#1901	chr3	132135831	132136239	WT-specific
#1902	chr3	134204625	134205052	WT-specific
#1903	chr3	136713687	136714112	WT-specific
#1904	chr3	148897860	148898300	WT-specific
#1905	chr3	149530207	149531039	WT-specific
#1906	chr3	151984307	151984841	WT-specific
#1907	chr3	152552611	152553217	WT-specific
#1908	chr3	154950182	154950670	WT-specific
#1909	chr3	155572112	155572598	WT-specific
#1910	chr3	156806636	156807020	WT-specific
#1911	chr3	156848114	156848470	WT-specific
#1912	chr3	156877789	156878810	WT-specific
#1913	chr3	156892451	156892997	WT-specific
#1914	chr3	158519696	158519988	WT-specific
#1915	chr3	159542028	159542384	WT-specific
#1916	chr3	172280547	172280916	WT-specific
#1917	chr3	172467570	172468316	WT-specific
#1918	chr3	177645950	177646458	WT-specific
#1919	chr3	177928915	177929333	WT-specific
#1920	chr3	180707447	180707959	WT-specific
#1921	chr3	183041887	183042322	WT-specific
#1922	chr3	183164965	183165353	WT-specific
#1923	chr3	183735020	183735771	WT-specific
#1924	chr3	184052360	184052822	WT-specific
#1925	chr3	184529617	184530058	WT-specific
#1926	chr3	186131716	186132258	WT-specific
#1927	chr3	190231270	190231797	WT-specific
#1928	chr3	191047365	191047855	WT-specific
#1929	chr3	192520686	192521181	WT-specific
#1930	chr3	193720678	193721759	WT-specific
#1931	chr3	194047264	194048394	WT-specific
#1932	chr3	194209505	194210096	WT-specific
#1933	chr3	194354210	194354672	WT-specific
#1934	chr3	194393090	194393551	WT-specific
#1935	chr3	195213087	195213350	WT-specific
#1936	chr3	195384444	195384933	WT-specific
#1937	chr3	195503787	195504632	WT-specific
#1938	chr3	195603430	195603836	WT-specific
#1939	chr3	195717052	195717598	WT-specific
#1940	chr3	195808767	195809266	WT-specific
#1941	chr3	195995109	195995556	WT-specific
#1942	chr3	197154913	197155597	WT-specific
#1943	chr3	197354736	197355384	WT-specific
#1944	chr3	197521880	197522441	WT-specific
#1945	chr3	197603496	197604640	WT-specific
#1946	chr3	197634789	197635970	WT-specific
#1947	chr4	709625	710617	WT-specific
#1948	chr4	725078	726104	WT-specific
#1949	chr4	737837	738883	WT-specific
#1950	chr4	740419	740845	WT-specific
#1951	chr4	740847	741813	WT-specific
#1952	chr4	1037052	1037683	WT-specific
#1953	chr4	1568236	1568767	WT-specific
#1954	chr4	1616859	1617672	WT-specific
#1955	chr4	1714249	1714730	WT-specific
#1956	chr4	1983751	1984224	WT-specific
#1957	chr4	4576461	4576928	WT-specific
#1958	chr4	4992538	4992959	WT-specific
#1959	chr4	5706641	5707028	WT-specific
#1960	chr4	5732095	5732486	WT-specific
#1961	chr4	5760439	5761036	WT-specific
#1962	chr4	6734261	6734723	WT-specific
#1963	chr4	6784130	6784488	WT-specific
#1964	chr4	10097737	10098140	WT-specific
#1965	chr4	10107899	10108413	WT-specific
#1966	chr4	10130899	10131309	WT-specific
#1967	chr4	14540898	14541249	WT-specific
#1968	chr4	17479358	17479765	WT-specific
#1969	chr4	20030240	20030717	WT-specific
#1970	chr4	23023598	23023842	WT-specific
#1971	chr4	25314150	25314628	WT-specific
#1972	chr4	25378174	25378644	WT-specific
#1973	chr4	25995096	25995651	WT-specific
#1974	chr4	26585378	26585822	WT-specific
#1975	chr4	30539098	30539585	WT-specific
#1976	chr4	30804126	30804526	WT-specific
#1977	chr4	30950212	30950662	WT-specific
#1978	chr4	31462946	31463555	WT-specific
#1979	chr4	38315506	38316104	WT-specific
#1980	chr4	38320452	38320862	WT-specific
#1981	chr4	38622483	38623008	WT-specific
#1982	chr4	38674693	38675351	WT-specific
#1983	chr4	38675383	38675705	WT-specific
#1984	chr4	39527271	39527701	WT-specific
#1985	chr4	39529273	39529875	WT-specific
#1986	chr4	39814235	39815078	WT-specific
#1987	chr4	39815178	39816586	WT-specific
#1988	chr4	40024083	40024571	WT-specific
#1989	chr4	40058179	40058662	WT-specific
#1990	chr4	40478831	40479320	WT-specific
#1991	chr4	40517840	40518289	WT-specific
#1992	chr4	41258699	41259218	WT-specific
#1993	chr4	41992086	41992521	WT-specific
#1994	chr4	49288208	49289497	WT-specific
#1995	chr4	54342588	54343277	WT-specific
#1996	chr4	54933321	54933869	WT-specific
#1997	chr4	55083789	55084286	WT-specific
#1998	chr4	55422190	55422648	WT-specific
#1999	chr4	61352714	61353274	WT-specific
[truncated: 1,956 more rows]
