# Supplementary material for: Methylated cis-regulatory elements mediate KLF4-dependent gene transactivation and cell migration
Source: eLife. 2017 May 29;6:e20068. doi: 10.7554/eLife.20068 (PMC5466421; doi:10.7554/eLife.20068)
Supplement: Figure 3—source data 4. — DOI: http://dx.doi.org/10.7554/eLife.20068.010 [file elife-20068-fig3-data4.xlsx]

## Sheet: Sheet1
mCpG (M > 0.6)	WT-specific (N = 2733)		Shared (N = 1157)
6mer	numbers	freq	numbers	freq	enrichment score	Bonferroni
GCCGAG	254	0.0929382	50	0.0432152	2.15059	1.62953e-06
ATCGCT	174	0.0636663	27	0.0233362	2.72822	1.99994e-06
CTCGAA	131	0.0479327	18	0.0155575	3.08101	1.70375e-05
CACGTG	62	0.0226857	4	0.00345722	6.56184	0.00020674
CACGCT	119	0.0435419	18	0.0155575	2.79878	0.000263424
CACGCC	315	0.115258	80	0.0691443	1.66692	0.000284718
CCCGAG	165	0.0603732	32	0.0276577	2.18287	0.000438296
GCCGTG	99	0.0362239	14	0.0121003	2.99365	0.000832068
CCCGCC	307	0.112331	84	0.0726016	1.54722	0.00383636
TCCGCA	89	0.0325649	14	0.0121003	2.69126	0.0076255
