# Supplementary material for: Methylated cis-regulatory elements mediate KLF4-dependent gene transactivation and cell migration
Source: eLife. 2017 May 29;6:e20068. doi: 10.7554/eLife.20068 (PMC5466421; doi:10.7554/eLife.20068)
Supplement: Supplementary file 1. — DOI: http://dx.doi.org/10.7554/eLife.20068.019 [file elife-20068-supp1.xlsx]

## Sheet: Sheet1
Table 1. Direct downstream targets of KLF4-mCpG binding activity in GBM cells
GeneNames	gene symbol	annotation
NM_000700	ANXA1	annexin A1
NM_000100	CSTB	cystatin B (stefin B)
NM_005801	EIF1	eukaryotic translation initiation factor 1
NM_001042679	RHOC	ras homolog family member C
NM_002966	S100A10	S100 calcium binding protein A10
NM_031286	SH3BGRL3	SH3 domain binding glutamate-rich protein like 3
NM_001769	CD9	CD9 molecule
NM_004864	GDF15	growth differentiation factor 15
NM_002178	IGFBP6	insulin-like growth factor binding protein 6
NM_170707	LMNA	lamin A/C
NM_012385	NUPR1	nuclear protein, transcriptional regulator, 1
NM_005620	S100A11	S100 calcium binding protein A11
NM_000362	TIMP3	TIMP metallopeptidase inhibitor 3
NM_006826	YWHAQ	tyrosine 3-monooxygenase/tryptophan 5-monooxygenase activation protein, theta
NM_017491	WDR1	WD repeat domain 1
NM_182810	ATF4	activating transcription factor 4
NM_000574	CD55	CD55 molecule, decay accelerating factor for complement (Cromer blood group)
NM_001002857	ANXA2	annexin A2
NM_003329	TXN	thioredoxin
NM_001013251	SLC3A2	solute carrier family 3 (amino acid transporter heavy chain), member 2
NM_006623	PHGDH	phosphoglycerate dehydrogenase
NM_001114090	NGEF	neuronal guanine nucleotide exchange factor
NM_022818	MAP1LC3B	microtubule-associated protein 1 light chain 3 beta
NM_004635	MAPKAPK3	mitogen-activated protein kinase-activated protein kinase 3
NM_016531	KLF3	Kruppel-like factor 3 (basic)
NM_004083	DDIT3	DNA-damage-inducible transcript 3
NM_138440	VASN	vasorin
NM_006291	TNFAIP2	tumor necrosis factor, alpha-induced protein 2
NM_006270	RRAS	related RAS viral (r-ras) oncogene homolog
NM_007235	XPOT	exportin, tRNA
NM_021009	UBC	ubiquitin C
NM_001627	ALCAM	activated leukocyte cell adhesion molecule
NM_002306	LGALS3	lectin, galactoside-binding, soluble, 3
NM_001743	CALM2	calmodulin 2 (phosphorylase kinase, delta)
NM_015161	ARL6IP1	ADP-ribosylation factor-like 6 interacting protein 1
NM_001903	CTNNA1	catenin (cadherin-associated protein), alpha 1, 102kDa
NM_182507	KRT80	keratin 80
NM_003680	YARS	tyrosyl-tRNA synthetase
NM_001085481	MAP1LC3B2	microtubule-associated protein 1 light chain 3 beta 2
NM_002281	KRT81	keratin 81
NM_005896	IDH1	isocitrate dehydrogenase 1 (NADP+), soluble
NM_001127196	CNBP	CCHC-type zinc finger, nucleic acid binding protein
NM_002032	FTH1	ferritin, heavy polypeptide 1
NM_002961	S100A4	S100 calcium binding protein A4
NM_001353	AKR1C1	aldo-keto reductase family 1, member C1
NM_001696	ATP6V1E1	ATPase, H+ transporting, lysosomal 31kDa, V1 subunit E1
NM_003278	CLEC3B	C-type lectin domain family 3, member B
NM_006636	MTHFD2	methylenetetrahydrofolate dehydrogenase (NADP+ dependent) 2,
NM_033504	TMEM54	transmembrane protein 54
NM_182923	KLC1	kinesin light chain 1
NM_001164097	VCAN	versican
NM_025182	FAM214B	family with sequence similarity 214, member B
NM_183006	DLGAP4	discs, large (Drosophila) homolog-associated protein 4
NM_006029	PNMA1	paraneoplastic Ma antigen 1
NM_153321	PMP22	peripheral myelin protein 22
NM_017654	SAMD9	sterile alpha motif domain containing 9
NR_030725	RCC1	regulator of chromosome condensation 1
NM_003670	BHLHE40	basic helix-loop-helix family, member e40
NM_001197098	PRSS3	protease, serine, 3
NM_015842	LMO7	LIM domain 7
NM_001423	EMP1	epithelial membrane protein 1
NM_021732	AVPI1	arginine vasopressin-induced 1
NM_001242919	ZFAND6	zinc finger, AN1-type domain 6
NM_018890	RAC1	ras-related C3 botulinum toxin substrate 1 (rho family, small GTP binding protein Rac1)
NM_020728	ESYT2	extended synaptotagmin-like protein 2
NM_031498	GNGT2	guanine nucleotide binding protein (G protein), gamma transducing activity polypeptide 2
NM_001127190	CSK	c-src tyrosine kinase
NM_177401	MIDN	midnolin
NM_001718	BMP6	bone morphogenetic protein 6
NM_012242	DKK1	dickkopf WNT signaling pathway inhibitor 1
NM_017905	TMCO3	transmembrane and coiled-coil domains 3
NM_001161403	LIMS2	LIM and senescent cell antigen-like domains 2
NM_003359	UGDH	UDP-glucose 6-dehydrogenase
NM_004356	CD81	CD81 molecule
NM_181697	PRDX1	peroxiredoxin 1
NM_001715	BLK	B lymphoid tyrosine kinase
NM_145690	YWHAZ	tyrosine 3-monooxygenase/tryptophan 5-monooxygenase activation protein, zeta
NM_004723	ARHGEF2	Rho/Rac guanine nucleotide exchange factor (GEF) 2
NM_004924	ACTN4	actinin, alpha 4
NM_001135156	DPF1	D4, zinc and double PHD fingers family 1
NM_005928	MFGE8	milk fat globule-EGF factor 8 protein
NM_020733	HEG1	heart development protein with EGF-like domains 1
NM_005563	STMN1	stathmin 1
NM_004273	CHST3	carbohydrate (chondroitin 6) sulfotransferase 3
NM_025193	HSD3B7	hydroxy-delta-5-steroid dehydrogenase, 3 beta- and steroid delta-isomerase 7
NM_001902	CTH	cystathionase (cystathionine gamma-lyase)
NM_001201572	SEC22C	SEC22 vesicle trafficking protein homolog C (S. cerevisiae)
NM_000104	CYP1B1	cytochrome P450, family 1, subfamily B, polypeptide 1
NM_001136266	DAZAP2	DAZ associated protein 2
NM_014504	RABGEF1	RAB guanine nucleotide exchange factor (GEF) 1
NM_030759	NRBF2	nuclear receptor binding factor 2
NM_001785	CDA	cytidine deaminase
NM_019013	FAM64A	family with sequence similarity 64, member A
NM_003739	AKR1C3	aldo-keto reductase family 1, member C3
NM_205861	DHDDS	dehydrodolichyl diphosphate synthase
NM_001134439	PHLDB2	pleckstrin homology-like domain, family B, member 2
NM_000930	PLAT	plasminogen activator, tissue
NM_024519	FAM65A	family with sequence similarity 65, member A
NM_053279	FAM167A	family with sequence similarity 167, member A
NM_005628	SLC1A5	solute carrier family 1 (neutral amino acid transporter), member 5
NM_003937	KYNU	kynureninase
NM_001684	ATP2B4	ATPase, Ca++ transporting, plasma membrane 4
NM_201436	H2AFV	H2A histone family, member V
NM_079421	CDKN2D	cyclin-dependent kinase inhibitor 2D (p19, inhibits CDK4)
NM_001432	EREG	epiregulin
NM_006129	BMP1	bone morphogenetic protein 1
NM_002568	PABPC1	poly(A) binding protein, cytoplasmic 1
NM_001242837	AP2A2	adaptor-related protein complex 2, alpha 2 subunit
NM_012396	PHLDA3	pleckstrin homology-like domain, family A, member 3
NM_001024845	SLC6A9	solute carrier family 6 (neurotransmitter transporter, glycine), member 9
NM_001033570	AMZ2	archaelysin family metallopeptidase 2
NM_000476	AK1	adenylate kinase 1
NM_015492	C15orf39	chromosome 15 open reading frame 39
NM_001184823	VDAC2	voltage-dependent anion channel 2
NM_001113349	ECE1	endothelin converting enzyme 1
NM_198434	AURKA	aurora kinase A
